# Supplementary material
Source: Research Square preprint supplement (doi:10.21203/rs.3.rs-9957915/v1)
Supplement: Supplementary file 1 [file 2a1542d05cf1c9d7341ed870.xlsx]

## Sheet: Bishop2021 & PDS
Carbonates	Sample ID	Grain Size	2.3 µm	2.5 µm	3.4-3.5 µm	Source		(1) Reference:	Bishop et al. (2021)	https://doi.org/10.1029/2021EA001844
Magnesite	JB-JLB-946A	<45 µm	2.3015	2.5014	3.4204	1		(2) Repository:	RELAB	https://pds-speclib.rsl.wustl.edu/search.aspx
Magnesite	JB-JLB-946B	45-75 µm	2.3015	2.5014	3.4204	1
Magnesite	JB-JLB-946C	75-125 µm	2.3015	2.5014	3.4204	1
Magnesite	JB-JLB-946D	>125 µm	2.3015	2.5014	3.4227	1
Magnesite	JB-JLB-946E	<125 µm	2.3005	2.5026	3.4204	1
Magnesite	JB-JLB-1161A	<45 µm	2.3005	2.5014	3.4204	1
Magnesite	JB-JLB-1161B	45-125 µm	2.3005	2.5014	3.4204	1
Magnesite	JB-JLB-1161C	125-250 µm	2.3016	2.5014	3.4182	1
Magnesite	CB-EAC-006A (CRB106A)	<45 µm	2.302	2.5044	3.4241	2
Magnesite	CB-EAC-006B (CRB106B)	45-90 µm	2.302	2.5044	3.4241	2
Magnesite	CB-EAC-028A (CRB208A)	<45 µm	2.3041	2.4996	3.4264	2
Magnesite	CB-EAC-028B (CRB208B)	45-90 µm	2.3041	2.4996	3.4264	2
Magnesite	CB-EAC-070A (CRB144A)	<45 µm	2.3005	2.5002	3.4227	2
Magnesite	BE-JFM-044 (CC-06B)	25-75 µm	2.3036	2.5014	3.4272	2
Magnesite	BE-BLE-256 (MGC)	45-75 µm	2.3026	2.5002	3.425	2
Magnesite	SH-SJG-002 (2502)	<355 µm	2.305	2.5	3.425	2
Magnesite	SH-SJG-003 (2506)	<355 µm	2.305	2.505	3.43	2
Magnesite	SH-SJG-019 (2507)	<355 µm	2.305	2.505	3.43	2
Magnesite	ZL-ZAL-008	<212 µm	2.3108	2.5014	3.4227	2
Mg-siderite	JB-JLB-1162A	<45 µm	2.317	2.5221	3.4616	1
Mg-siderite	JB-JLB-1162B	45-125 µm	2.3191	2.5221	3.4592	1
Mg-siderite	JB-JLB-1162C	125-250 µm	2.317	2.5209	3.4592	1
Siderite	JB-JLB-1163A	<45 µm	2.3347	2.5394	3.4825	1
Siderite	JB-JLB-1163B	45-125 µm	2.3337	2.5381	3.4801	1
Siderite	JB-JLB-1163C	125-250 µm	2.3358	2.5381	3.4801	1
Siderite	JB-JLB-1462A	<45 µm	2.3232	2.5258	3.4662	1
Siderite	JB-JLB-1462B	45-75 µm	2.3201	2.5258	3.4662	1
Siderite	JB-JLB-1462C	75-90 µm	2.3211	2.5258	3.4662	1
Siderite	JB-JLB-1462D	90-125 µm	2.3201	2.5246	3.4662	1
Siderite	JB-JLB-1462E	125-250 µm	2.3201	2.5246	3.4685	1
Siderite	JB-JLB-1463A	<45 µm	2.3337	2.5344	3.506	1
Siderite	JB-JLB-1463B	45-75 µm	2.3305	2.5332	3.4778	1
Siderite	JB-JLB-1463C	75-90 µm	2.3316	2.5344	3.4801	1
Siderite	JB-JLB-1463D	90-125 µm	2.3326	2.5344	3.506	1
Siderite	JB-JLB-1463E	125-250 µm	2.3337	2.5344	3.4778	1
Siderite	CB-EAC-008A (CRB108A)	<45 µm	2.3373	2.5437	3.4957	2
Siderite	CB-EAC-008B (CRB108B)	45-90 µm	2.3352	2.5412	3.4957	2
Siderite	CB-EAC-069A (CRB143A)	<45 µm	2.3243	2.527	3.473	2
Siderite	CB-EAC-071A (CRB145A)	<45 µm	2.3243	2.5246	3.4616	2
Siderite	CB-EAC-074A (CRB701A)	<45 µm	2.336	2.5357	3.4848	2
Siderite	GR-CMP-003 (XX03101)	<56 µm	2.3368	2.534	3.486	2
Siderite	SH-SJG-005 (6515B)	<355 µm	2.325	2.52	3.47	2
Siderite	ZL-ZAL-015	<212 µm	2.3263	2.5344	3.4919	2
Mg-calcite	JB-JLB-825	<250 µm	2.3263	2.516	3.4615	1
Mg-calcite	JB-JLB-826	<250 µm	2.3263	2.5111	3.4546	1
Mg-calcite	JB-JLB-827	<250 µm	2.3222	2.5135	3.4546	1
Calcite	JB-JLB-1457A	<45 µm	2.34	2.5369	3.4569	1
Calcite	JB-JLB-1457B	45-75 µm	2.34	2.5369	3.4546	1
Calcite	JB-JLB-1457C	75-90 µm	2.34	2.5369	3.456	1
Calcite	JB-JLB-1457D	90-125 µm	2.34	2.5369	3.4778	1
Calcite	JB-JLB-1457E	125-250 µm	2.34	2.5369	3.4569	1
Calcite	JB-JLB-1458A	<45 µm	2.3421	2.5381	3.4569	1
Calcite	JB-JLB-1458B	45-75 µm	2.341	2.5369	3.4569	1
Calcite	JB-JLB-1458C	75-90 µm	2.341	2.5369	3.4755	1
Calcite	JB-JLB-1458D	90-125 µm	2.341	2.5369	3.4546	1
Calcite	JB-JLB-1458E	125-250 µm	2.341	2.5369	3.4778	1
Calcite	JB-JLB-1460A	<45 µm	2.3379	2.5344	3.4848	1
Calcite	JB-JLB-1460B	45-75 µm	2.3379	2.5344	3.4778	1
Calcite	JB-JLB-1460C	75-90 µm	2.3379	2.5344	3.4731	1
Calcite	JB-JLB-1460D	90-125 µm	2.3379	2.5344	3.456	1
Calcite	JB-JLB-1460E	125-250 µm	2.3379	2.5344	3.4569	1
Calcite	HS194A	<74 µm	2.339	2.538	3.479	1
Calcite	HS194B	74-250 µm	2.34	2.536	3.479	1
Calcite	HS48A	<74 µm	2.338	2.536	3.477	1
Calcite	HS48B	74-250 µm	2.338	2.535	3.479	1
Calcite	JB-JLB-551	90-125 µm	2.3415	2.5388	3.4793	1
Calcite	JB-JLB-552	125-180 µm	2.3415	2.5388	3.477	1
Calcite	JB-JLB-553	180-250 µm	2.3415	2.5388	3.4793	1
Calcite	CB-EAC-009A (CRB109A)	<45 µm	2.3394	2.5363	3.4816	2
Calcite	CB-EAC-009B (CRB109B)	45-90 µm	2.3394	2.5363	3.4816	2
Calcite	CB-EAC-010A (CRB110A)	<45 µm	2.339	2.536	3.482	2
Calcite	CB-EAC-011A (CRB111A)	<45 µm	2.342	2.539	3.484	2
Calcite	CB-EAC-012A (CRB112A)	<45 µm	2.3415	2.5388	3.4816	2
Calcite	CB-EAC-012B (CRB112B)	45-90 µm	2.3415	2.5388	3.4816	2
Calcite	CB-EAC-013A (CRB113A)	<45 µm	2.3415	2.536	3.484	2
Calcite	CB-EAC-013B (CRB113B)	45-90 µm	2.3415	2.5388	3.484	2
Calcite	CB-EAC-016A (CRB116A)	<45 µm	2.3389	2.5367	3.4778	2
Calcite	CB-EAC-018A (CRB118A)	<45 µm	2.3389	2.5369	3.4801	2
Calcite	CB-EAC-042A (CRB122A)	<45 µm	2.3389	2.5369	3.4778	2
Calcite	CB-EAC-063A (CRB128A)	<45 µm	2.34	2.537	3.48	2
Calcite	CB-EAC-065A (CRB131A)	<45 µm	2.341	2.537	3.48	2
Aragonite	JB-JLB-1459A	<45 µm	2.318	2.5221	3.4778	1
Aragonite	JB-JLB-1459B	45-75 µm	2.3191	2.5221	3.4569	1
Aragonite	JB-JLB-1459C	75-90 µm	2.3191	2.5221	3.4801	1
Aragonite	JB-JLB-1459D	90-125 µm	2.318	2.5221	3.4778	1
Aragonite	JB-JLB-1459E	125-250 µm	2.318	2.5221	3.4801	1
Aragonite	JB-JLB-1640A	<45 µm	2.3189	2.5213	3.5071	1
Aragonite	JB-JLB-1640B	45-75 µm	2.3194	2.5213	3.5059	1
Aragonite	JB-JLB-1640C	75-90 µm	2.3189	2.5213	3.5059	1
Aragonite	JB-JLB-1640D	90-125 µm	2.3184	2.5213	3.5059	1
Aragonite	JB-JLB-1640E	125-250 µm	2.3184	2.5213	3.5059	1
Aragonite	JB-JLB-1659	<125 µm	2.3189	2.5219	3.5059	1
Aragonite	B10083A	<74 µm	2.318	2.521	3.505	1
Aragonite	B10083B	74-250 µm	2.318	2.52	3.505	1
Aragonite	CB-EAC-002A (CRB102A)	<45 µm	2.335	2.524	3.4309	2
Aragonite	CB-EAC-002B (CRB102B)	45-90 µm	2.3373	2.5288	3.4309	2
Aragonite	CB-EAC-019A (CRB119A)	<45 µm	2.32	2.522	3.427	2
Aragonite	CB-EAC-020A (CRB120A)	<45 µm	2.317	2.522	3.427	2
Aragonite	CB-EAC-043A (CRB123A)	<45 µm	2.319	2.522	3.427	2
Aragonite	CB-EAC-044A (CRB124A)	<45 µm	2.318	2.521	3.427	2
Aragonite	CB-EAC-045A (CRB125A)	<45 µm	2.318	2.521	3.427	2
Dolomite	JB-JLB-1461A	<45 µm	2.3243	2.5196	3.4801	1
Dolomite	JB-JLB-1461B	45-75 µm	2.3232	2.5184	3.4778	1
Dolomite	JB-JLB-1461C	75-90 µm	2.3243	2.5196	3.4662	1
Dolomite	JB-JLB-1461D	90-125 µm	2.3243	2.5184	3.4569	1
Dolomite	JB-JLB-1461E	125-250 µm	2.3263	2.5209	3.4778	1
Dolomite	JB-JLB-779	<125 µm	2.3222	2.516	3.4523	1
Dolomite	R12596A	<74 µm	2.323	2.514	3.449	1
Dolomite	R12596B	74-250 µm	2.324	2.515	3.451	1
Dolomite	HS102A	<74 µm	2.325	2.514	3.449	1
Dolomite	HS102B	74-250 µm	2.325	2.514	3.449	1
Dolomite	Vergo 3F	<74 µm	2.323	2.517	3.451	1
Dolomite	Vergo 3C	74-250 µm	2.322	2.515	3.451	1
Dolomite	CB-EAC-003A (CRB103A)	<45 µm	2.3247	2.519	3.4584	2
Dolomite	CB-EAC-003B (CRB103B)	45-90 µm	2.3247	2.519	3.4584	2
Dolomite	CB-EAC-017A (CRB117A)	<45 µm	2.322	2.516	3.452	2
Dolomite	PD-SJG-005 (2501)	<355 µm	2.325	2.515	3.455	2
Dolomite	SH-SJG-008 (6508)	<355 µm	2.325	2.515	3.465	2
Dolomite	SH-SJG-006 (6509)	<355 µm	2.325	2.515	3.47	2
Dolomite	SH-SJG-007 (6510b)	<355 µm	2.325	2.515	3.46	2
Dolomite	SH-SJG-077 (6521)	<250 µm	2.3247	2.519	3.4676	2
Dolomite	SH-SJG-078 (6523)	<250 µm	2.323	2.517	3.454	2
Dolomite	SH-SJG-079 (6528)	<250 µm	2.323	2.519	3.458	2
Dolomite	SH-SJG-080 (6529)	<250 µm	2.325	2.517	3.458	2
Ankerite	JB-JLB-778	<125 µm	2.314	2.531	3.478	1
Ankerite	CB-EAC-064A (CRB130A)	<45 µm	2.338	2.532	3.478	2
Ankerite	CB-EAC-066A (CRB140A)	<45 µm	2.337	2.53	3.477	2
Rhodochrosite (Mn)	HS67	<250 µm	2.3629	2.5525	3.5123	1
Rhodochrosite (Mn)	HS338	<250 µm	2.3597	2.5538	3.5099	1
Rhodochrosite (Mn)	SH-SJG-004 (3505)	<355 µm	2.365	2.56	3.52	2
Rhodochrosite (Mn)	CB-EAC-068A (CRB142A)	<45 µm	2.3389	2.5531	3.5155	2
Strontianite (Sr)	JB-JLB-1658	<125 µm	2.3467	2.5561	3.4742	1
Strontianite (Sr)	HS272	74-250 µm	2.3468	2.555	3.4723	1
Strontianite (Sr)	SH-SJG-009 (11502)	<355 µm	2.35	2.56	3.475	2
Strontianite (Sr)	SH-SJG-010 (11503)	<355 µm	2.35	2.56	3.48	2
Witherite (Ba)	HS273	74-250 µm	2.3791	2.5882	3.5218	1
Smithsonite (Zn)	SH-SJG-020 (4506)	<355 µm	2.365	2.555	3.525	2
Smithsonite (Zn)	SH-SJG-081 (4512)	<250 µm	2.365	2.556	3.515	2
Natrite	JB-JLB-1744	<125 µm	2.3531	2.5498	3.5059	1
Natrite	CB-EAC-034 (CRB214Bk)	<45 µm	2.3543	2.5512	3.5075	2
Natrite	CB-EAC-079 (SYN009)	<45 µm	2.3527	2.5494	3.506	2
Natron	CB-MSG-090	<125 µm	2.352	2.549	3.506	2
K Carbonate	JB-JLB-1745	<125 µm	2.3966	2.5991	3.5711	1

## Sheet: SSHADE
Fe-Mg carbonates	Location	Mg# (%)	2.3 µm	2.5 µm	3.4-3.5 µm	Compositions		Reference:	Beck et al. (2024)	https://doi.org/10.1029/2024EA003666
S500 (Fe-magnesite)	n/a	66.9	2.305	2.51	3.46	(Mg0.53Fe0.46Mn0.01)CO3		Repository:	SSHADE	https://www.sshade.eu/search/spectrum
S2315 (Fe-magnesite)	n/a	54.9	2.31	2.515	3.49	(Mg0.41Fe0.55Ca0.01Mn0.03)CO3
Vizille (Mg-siderite)	Vizille, France	42.4	2.307	2.516	3.464	(Mg0.29Fe0.69Ca0.01Mn0.01)CO3
Allevard (Mg-siderite)	Allevard, France	30.6	2.309	2.515	3.472	(Mg0.20Fe0.77Ca0.01Mn0.03)CO3
Julcani (Mg-siderite)	Julcani, Peru	24.7	2.32	2.52	3.48	(Mg0.16Fe0.83Ca0.01Mn0.01)CO3
Iouriren (Mg-siderite)	Iouriren, Marocco	19.8	2.315	2.519	3.479	(Mg0.12Fe0.85Mn0.03)CO3
