# Supplementary material
Source: Research Square preprint supplement (doi:10.21203/rs.3.rs-9957915/v1)
Supplement: Supplementary file 1 [file 06db87f5046a2f3f4a8d35d4.pdf]

## Supporting Materials for “Widespread clay–carbonate co-occurrence reveals advanced aqueous alteration on Mars”

Jeremy Brossier\*, Maria Cristina De Sanctis, Francesca Altieri, Marco Ferrari, Andrea Raponi, Vito Saggese, Monica Rasmussen, Alessandro Frigeri, Simone De Angelis, Enrico Bruschini

*Affiliation: Institute for Space Astrophysics and Planetology (IAPS), National Institute of Astrophysics (INAF), Rome, Italy*

\*Corresponding author: Jeremy Brossier ([jeremy.brossier@inaf.it](mailto:jeremy.brossier@inaf.it), [brossier.jrmy@gmail.com](mailto:brossier.jrmy@gmail.com))

ORCID: 0000-0001-7423-2494

---

### A. Continuum Removal & Band Depth Classification

**Figure S1.1** – Selected spectra of denoised CRISM reflectance after continuum removal over the 2.2 to 2.6  $\mu\text{m}$  range, emphasizing the diagnostic absorptions at 2.3 and 2.4  $\mu\text{m}$  typical of ferromagnesian clays, as well as the 2.5  $\mu\text{m}$  feature possibly associated with carbonates. The 2.5  $\mu\text{m}$  band exhibits variable intensities, enabling a straightforward classification according to band depth (BD25; **Table S1**): strong absorptions (BD25 > 2%) are observed in 13 cubes, intermediate values (1–2%) in 127 cubes, and low values (0.3–0.9%) in 278 cubes. Continuum-removal also allows accurate determination of band center (BC) positions. A comparable approach was employed by ref. (28) to characterize and compare an extensive suite of carbonate samples.

**Figure S1.2** – Examples of denoised, continuum-removed CRISM reflectance spectra over the 3.35–3.55  $\mu\text{m}$  range for clay-rich deposits, illustrating the possible absorption near 3.5  $\mu\text{m}$  identified in 342 targeted cubes. In most instances, this feature remains weak, with band depths generally below 1% (BD35; **Table S1**). The band is tentatively identified in 103 cubes with very low values (0.1–0.2%), while it is clearly resolved in 239 cubes with intermediate values (0.3–1%) or higher values (above 1%).

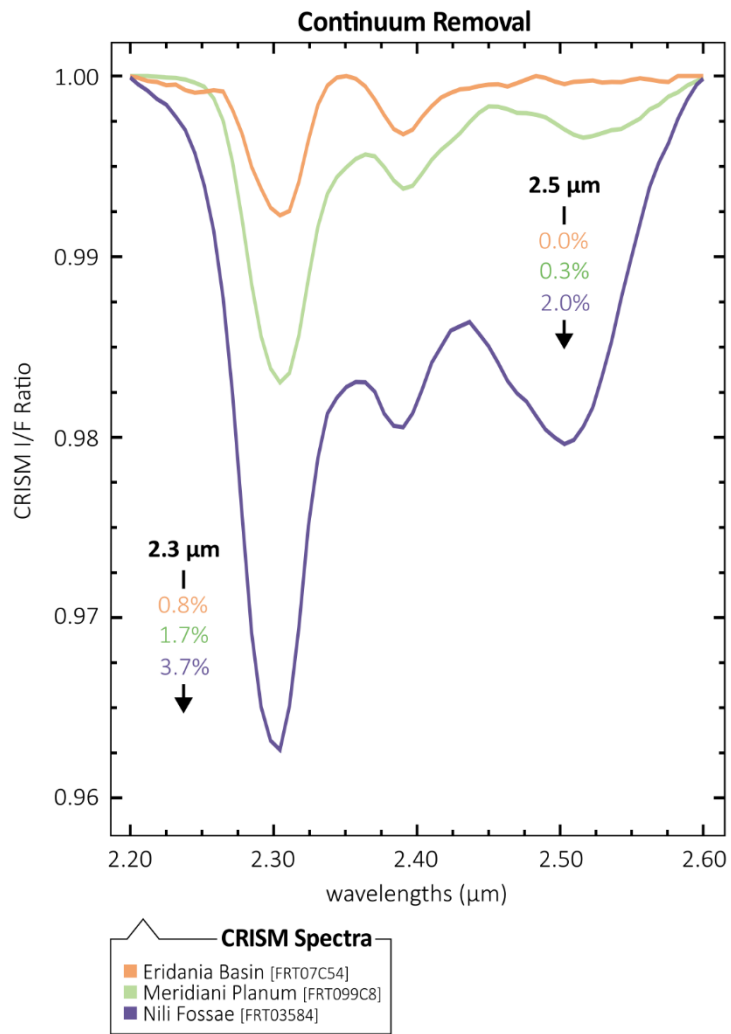

Figure S1.1

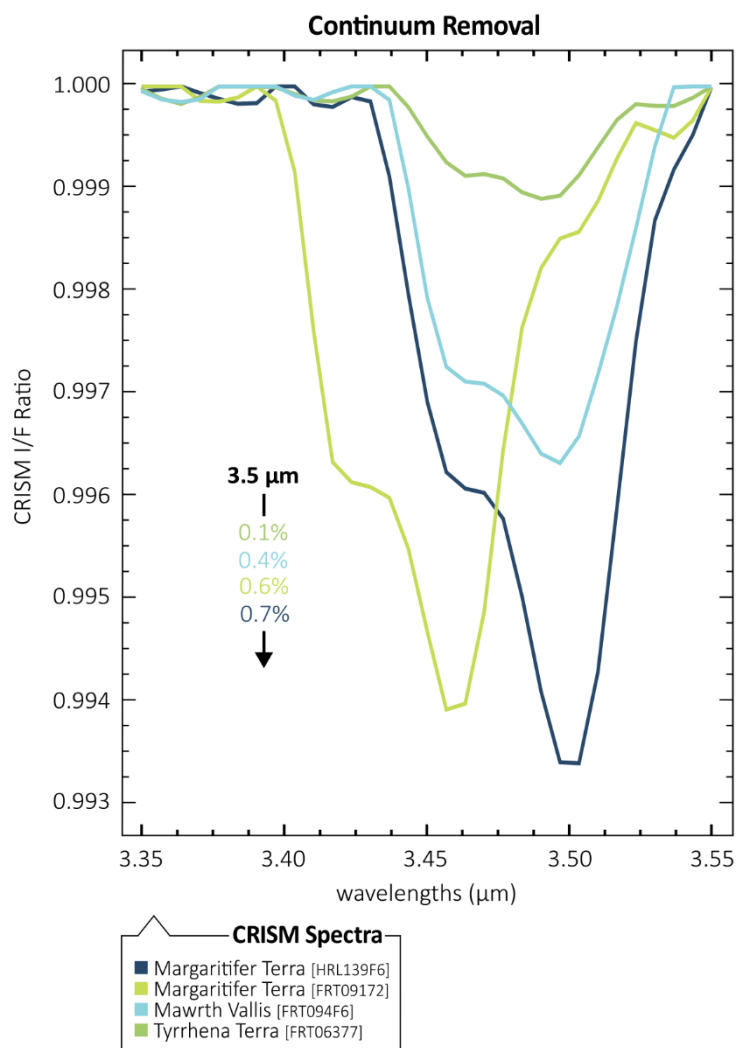

Figure S1.2

## B. Additional Spectral Indexes

We also computed additional spectral criteria to emphasize the carbonate-clay associations. In the following example figures, we present several CRISM indices commonly used to identify clays and carbonates.

**Figure S2.1** – Maps of clay-carbonates outcrops derived from unprojected CRISM cubes acquired at three sites of interest: Lunae Planum (FRT1957D), McLaughlin crater (FRT0A5AA), and Nili Fossae (FRT186FA). (A) False-color (RGB) composites (R: 2.53  $\mu\text{m}$ , G: 1.51  $\mu\text{m}$ , B: 1.08  $\mu\text{m}$ ). (B) Maps of the reflectance drop near 2.3  $\mu\text{m}$  (“*D2300*” index, shown in blue), frequently used to indicate ferromagnesian clays and, in some cases, carbonates (2,38). (C) Maps of the spectral slope between 1.1 and 1.8  $\mu\text{m}$  (“*FeSlope*” index, purple), often referred to as ferrous slope due to contributions from ferrous ( $\text{Fe}^{2+}$ )-bearing phases such as olivine, carbonates, or even smectites. (D) Maps of the spectral slope from 2.1 to 2.5  $\mu\text{m}$  (“*HdSlope*” index, green), commonly induced by hydrated minerals including smectites, sulfates, chlorites, and carbonates. (E) Maps of the “*BD3900*” index (yellow), revealing a convex spectral feature centered near 3.6–3.7  $\mu\text{m}$  together with a reflectance drop near 3.9  $\mu\text{m}$  (3,23,25). Both the “*D2300*” and “*BD3900*” index maps suggest a spatial correlation between clay-related absorptions (combined bands near 1.4, 1.9, 2.3, and 2.4  $\mu\text{m}$ ) and the carbonate-related features (absorption at 2.5  $\mu\text{m}$  and broad bulge-like feature near 3.6–3.7  $\mu\text{m}$  induced by paired absorptions around 3.4–3.5  $\mu\text{m}$  and 3.9  $\mu\text{m}$ ).

**Figure S2.2** – Scatterplots comparing the “*D2300*” and “*BD3900*” parameters for the three cubes. They indicate a strong correspondence between clay-related and carbonate-related spectral features in specific areas (ROIs).

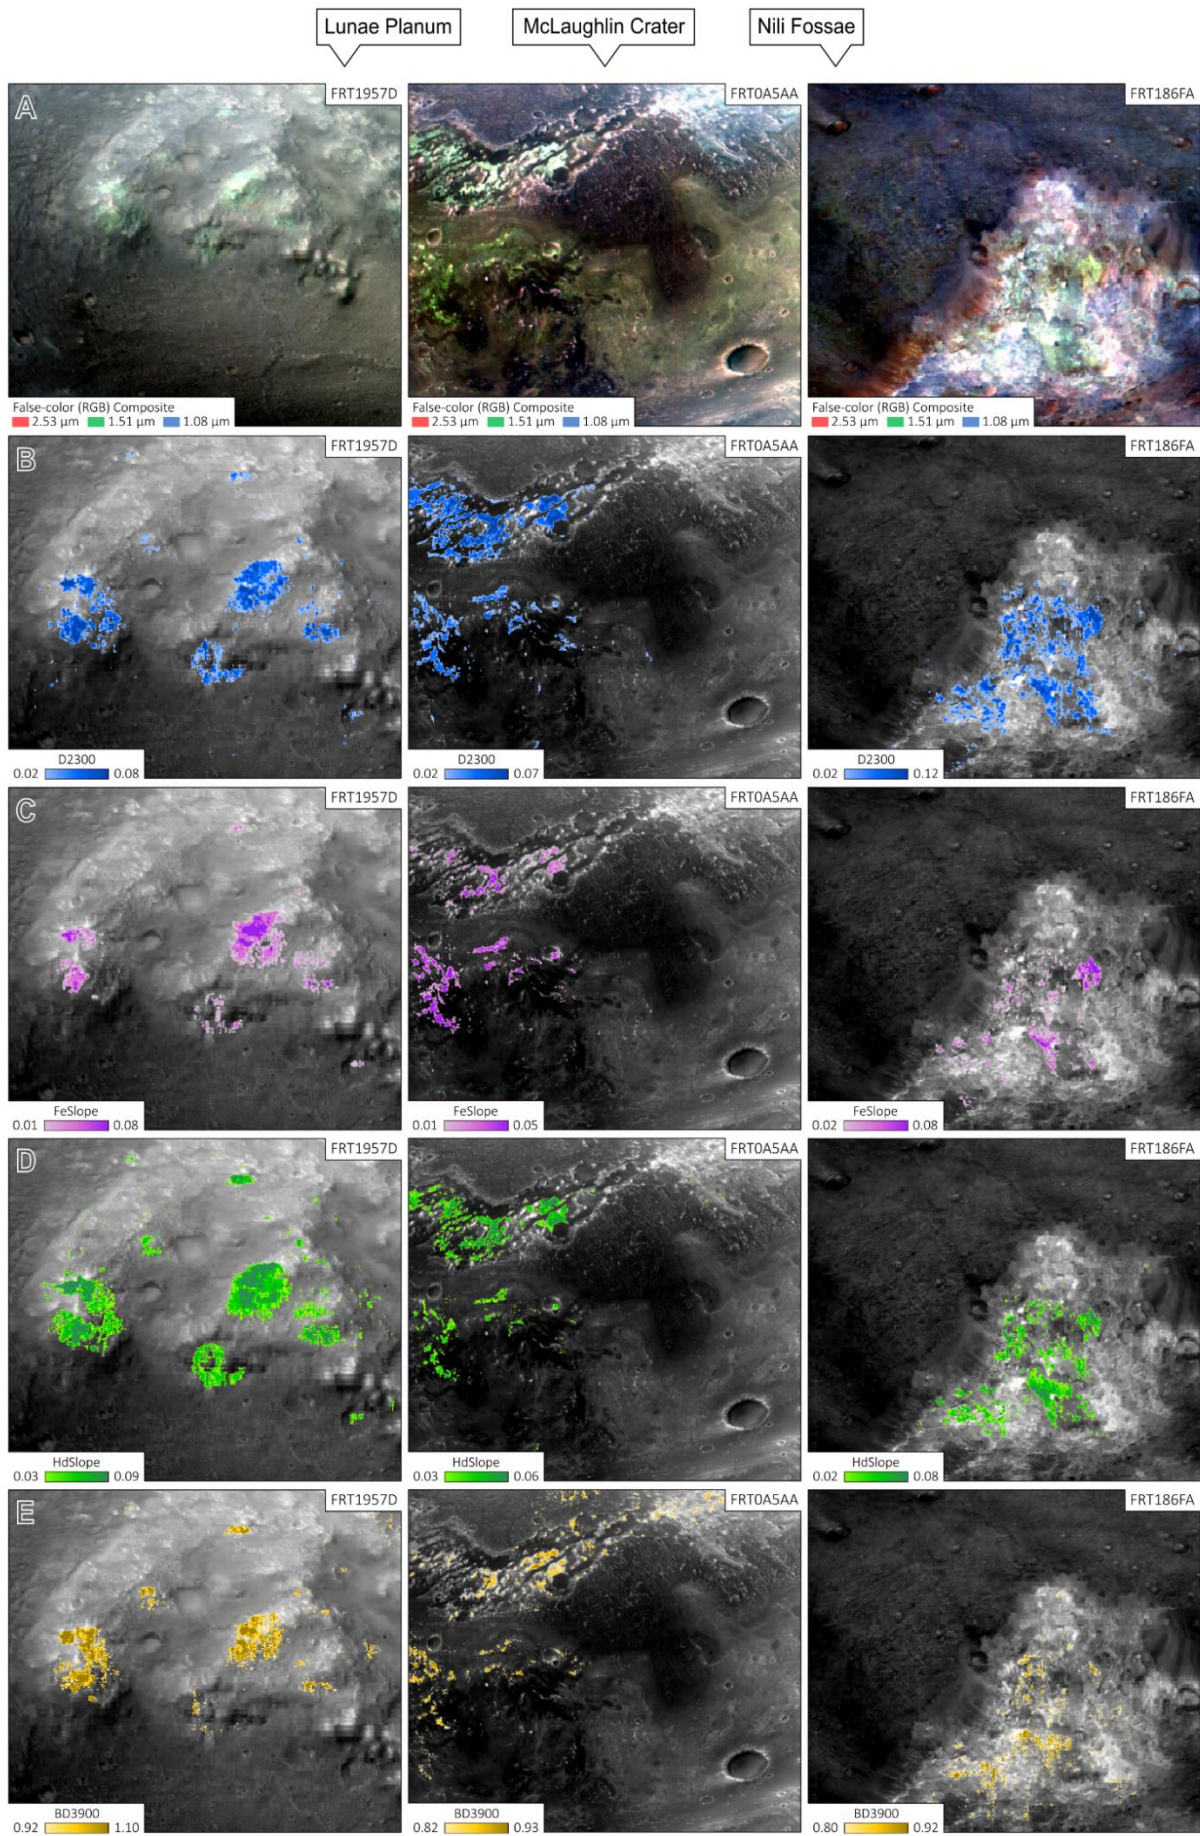

Figure S2.1

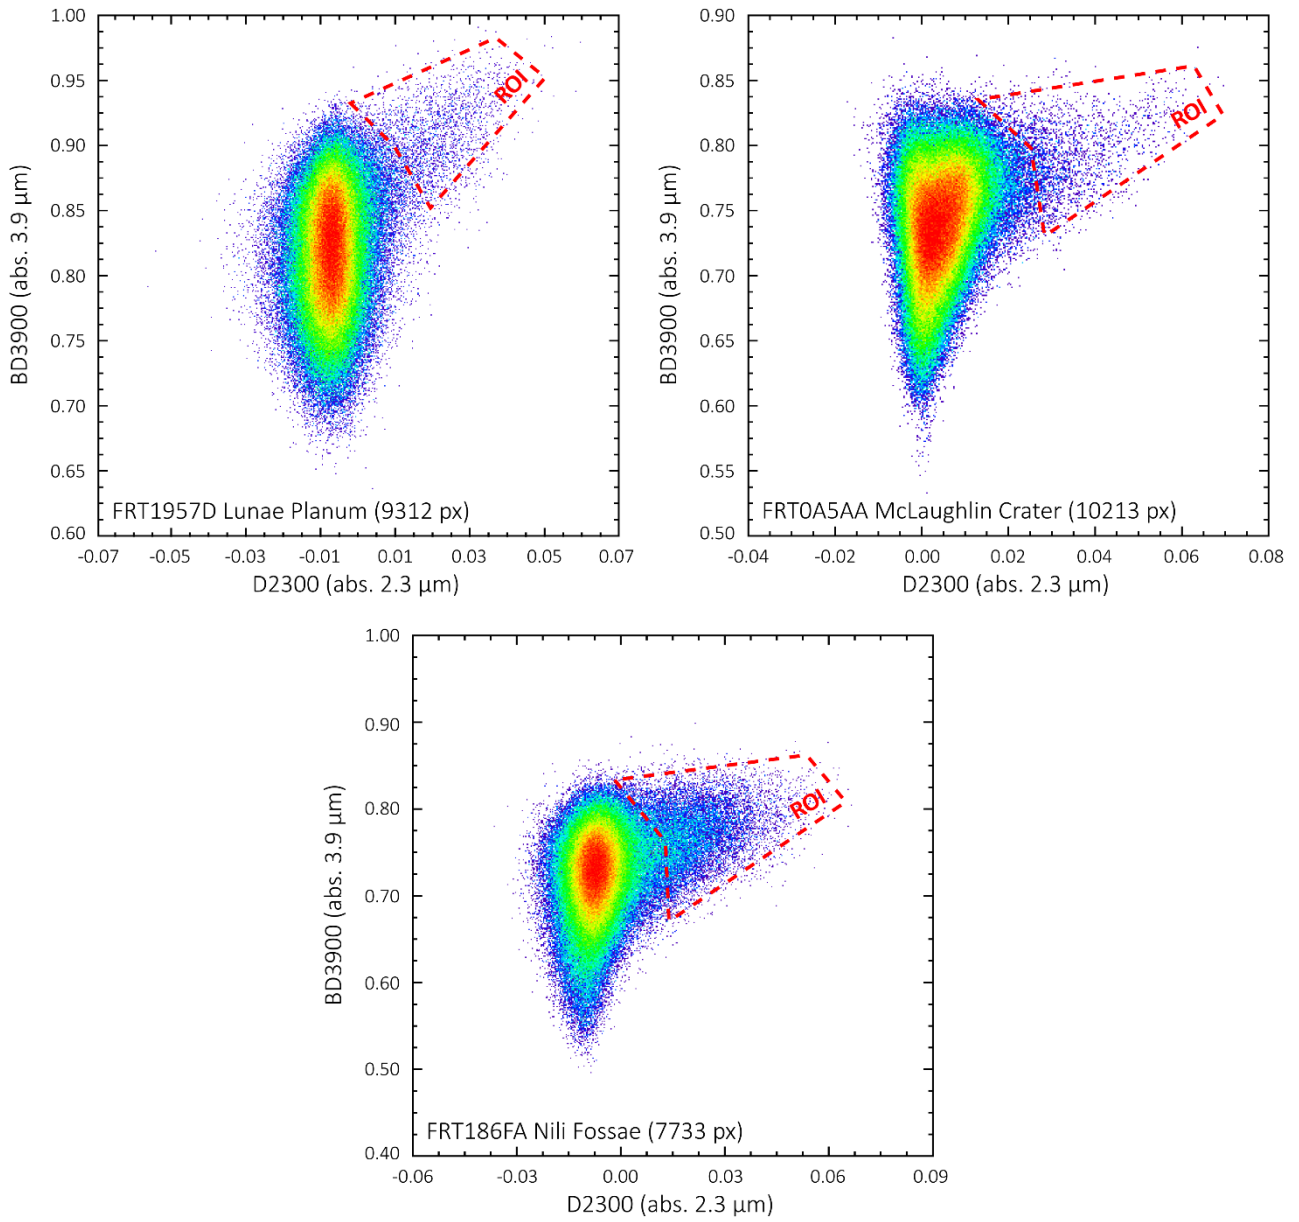

Figure S2.2

### C. Uneven Distribution of CRISM data

Some regions, notably Mawrth Vallis, Nili Fossae and Meridiani Planum, were heavily observed during the nominal phase of the Mars Reconnaissance Orbiter mission (43). Consequently, these areas contain a disproportionately large number of targeted observations acquired by the CRISM instrument. In our dataset, Mawrth Vallis, Nili Fossae, and Meridiani Planum account for 71, 106, and 47 cubes, respectively, together representing roughly 40% of all analyzed cubes in this survey. Given this uneven spatial distribution of CRISM cubes Mars, we evaluated whether such sampling bias could influence the global interpretation of the results. To do so, we produced additional histograms and pie charts excluding these heavily sampled regions for the 2.3, 2.5, and 3.5  $\mu\text{m}$  absorption bands. The results indicate that the relative proportions of these bands and their precise positions remain largely unchanged.

**Figure S3.1** – (A,B) Band centers for the 2.3 and 2.5  $\mu\text{m}$  absorptions were determined after continuum removal to enhance band contrast and improve readability. Values are subdivided according to the intensity of the 2.5  $\mu\text{m}$  band observed in this survey, expressed as band depth values (BD25; **Table S1**): none (below 0.3%), weak (0.3-0.9%), moderate (1-2%), and strong (above 2%). In the 2.3  $\mu\text{m}$  window, band centers range from 2.29 to 2.32  $\mu\text{m}$ , whereas in the 2.5  $\mu\text{m}$  window they span 2.50 to 2.54  $\mu\text{m}$ . The mean values are  $2.304 \pm 0.007 \mu\text{m}$  and  $2.516 \pm 0.009 \mu\text{m}$ , respectively. (C) Pie chart showing the relative frequencies of clays and possible carbonates identified in this study, excluding oversampled regions (i.e., Mawrth Vallis, Nili Fossae, and Meridiani Planum). Paired absorptions at 2.3 and 2.5  $\mu\text{m}$  are clearly detected in 215 cubes. Numbers labeled in each segment indicate the corresponding detection counts.

**Figure S3.2** – (A) Band centers for the 3.5  $\mu\text{m}$  absorption were determined, where present, after continuum removal to enhance band contrast and improve readability. Values are subdivided according to the intensity of the 3.5  $\mu\text{m}$  band, expressed as band depth values (BD35; **Table S1**): tentative detection (0.1–0.2%), weak (0.3–1%), and strong (above 1%). In this window, values range from 3.44 to 3.50  $\mu\text{m}$ , with a mean value of  $3.480 \pm 0.020 \mu\text{m}$ . (B) Pie chart illustrating the relative frequencies of absorptions identified in this study, excluding heavily sampled regions. All three bands (2.3, 2.5, and 3.5  $\mu\text{m}$ ) are collectively detected in 177 cubes.

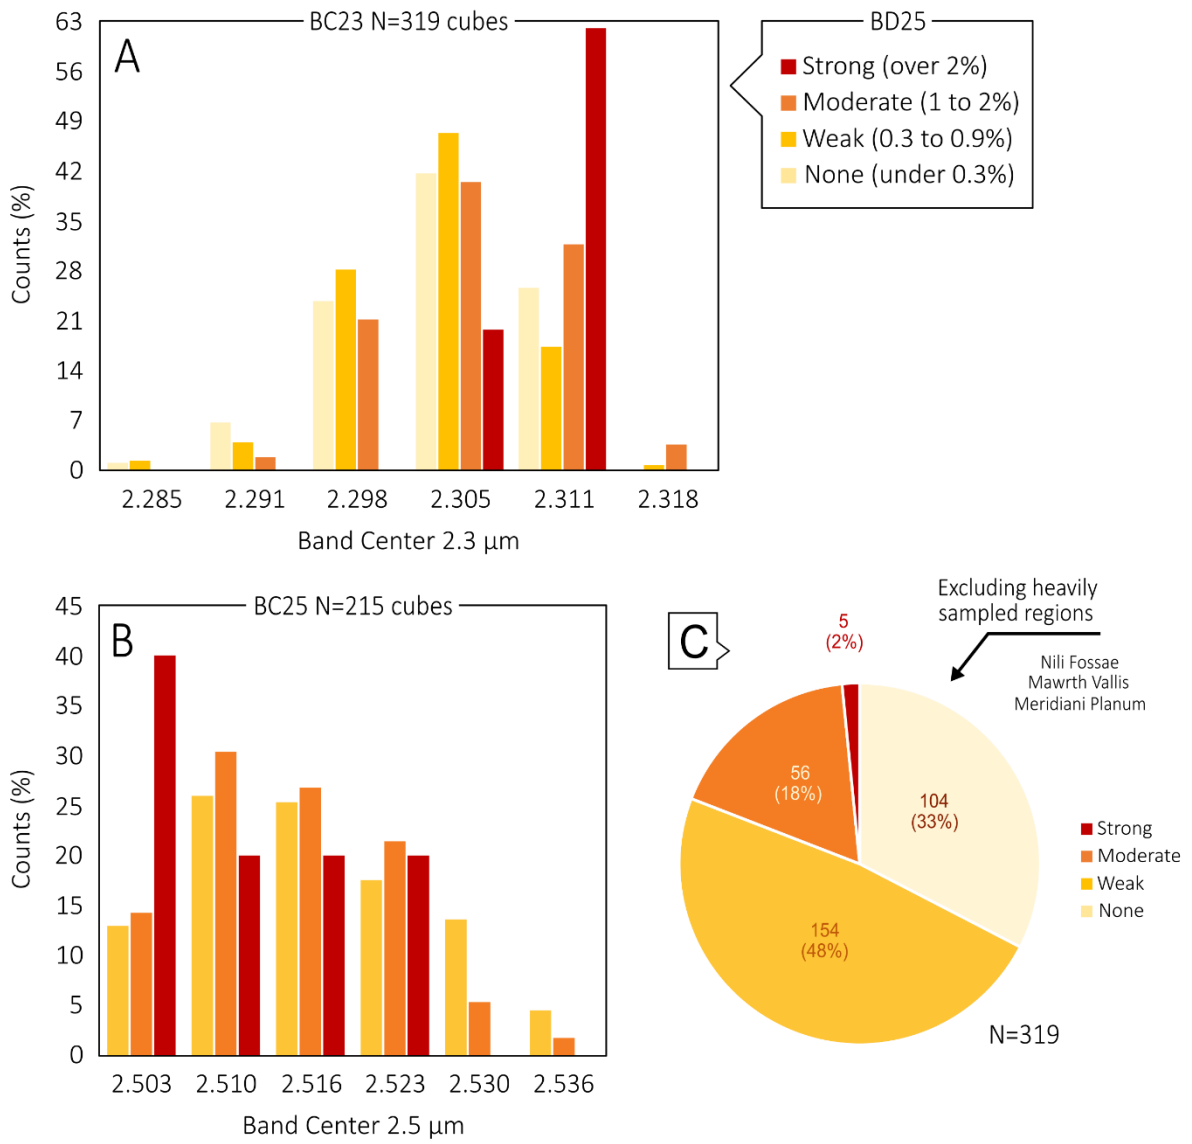

Figure S3.1

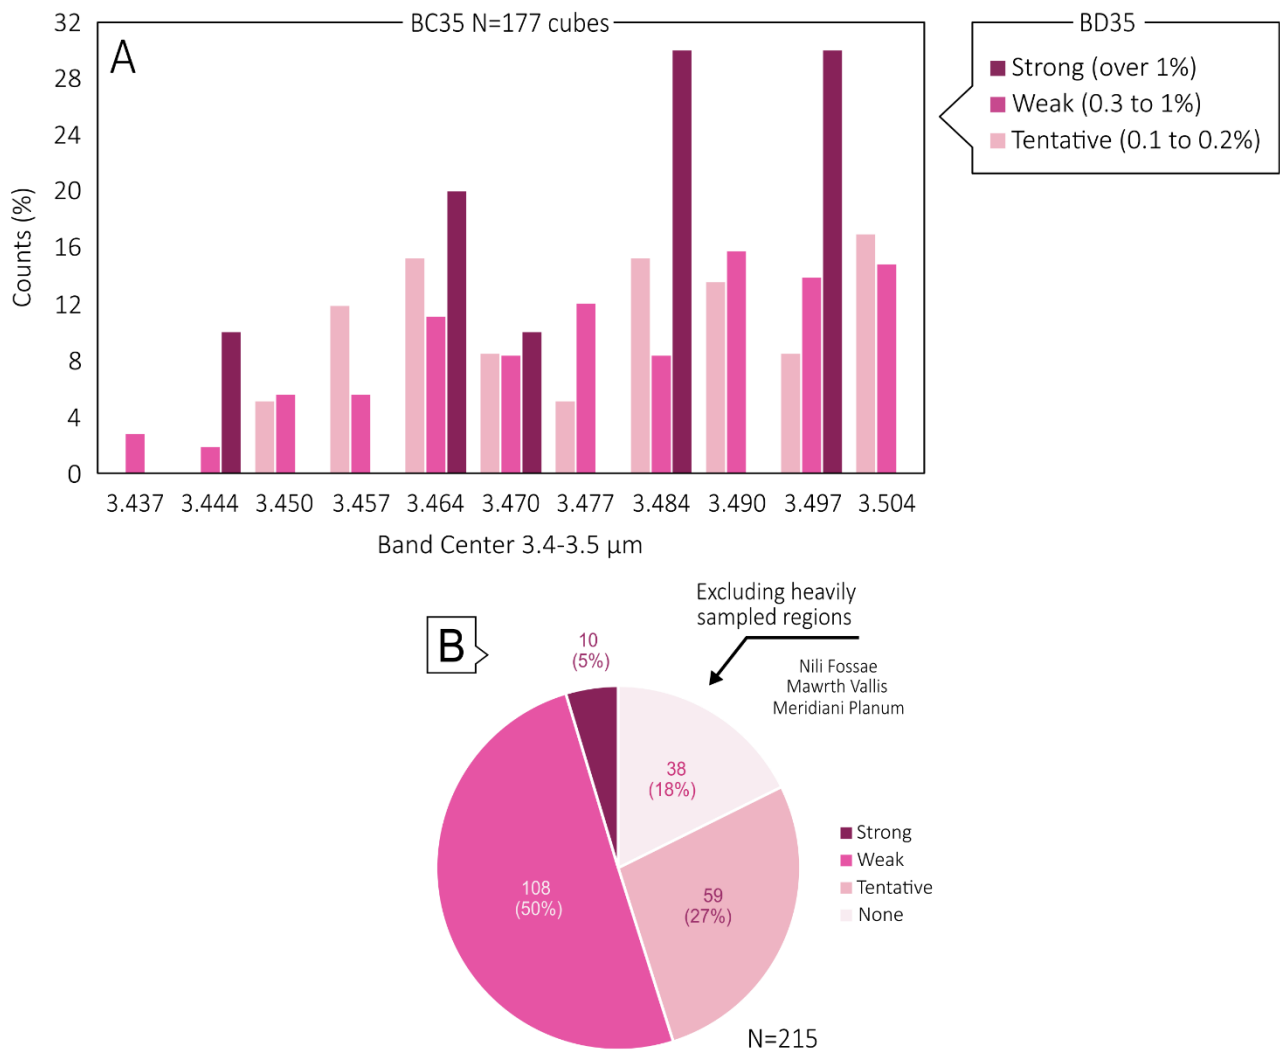

Figure S3.2

References:

See numbered references in main text.
