# Supplementary material
Source: Research Square preprint supplement (doi:10.21203/rs.3.rs-9957915/v1)
Supplement: Supplementary file 2 [file fdb46fa95935b09f3908e074.xlsx]

## Sheet: Detected 2.5 (418)
	Label	Lat	Lon	Date	Region	ROIs	BC23	BD23	BC25	BD25	BC35	BD35	Carb1	Carb2	Others Phases?			Notes:
	FRT090F8	19.9	62.9	December 2007	Antonialdi	1501	2.298	0.011	2.51	0.003	3.45	0.002	1	2
	FRT0AB8D	19.8	62.9	May 2008	Antonialdi	1689	2.298	0.01	2.51	0.004	3.464	0.002	1	2				Carb1 (BD25)	0	None (<0.3%) - 122 cubes
	FRT0A94C	19.7	62.9	April 2008	Antonialdi	2259	2.298	0.012	2.503	0.005	3.464	0.002	1	2				N=540	1	Weak (0.3-0.9%) - 278 cubes
	FRT089B0	-27.6	260	November 2007	Claritas Rise	372	2.305	0.009	2.51	0.005	3.477	0.002	1	2					2	Moderate (1-2%) - 127 cubes
	FRT0A303	35.7	35.5	March 2008	Deuteronilus	3700	2.291	0.005	2.503	0.003	3.49	0.001	1	2					3	Strong <2%) - 13 cubes
	FRT2437A	35.6	13.7	April 2012	Deuteronilus	1018	2.285	0.009	2.51	0.007	3.464	0.003	1	3
	FRT0C380	36.2	14.4	August 2008	Deuteronilus	1703	2.291	0.009	2.51	0.009	x	x	1	1
	FRT096FE	-28.3	181.6	January 2008	Eridania Basin	5897	2.298	0.012	2.51	0.003	3.49	0.002	1	2	Sulfates			Carb2 (BD35)	0	No BD25, BD35
	FRT09E4C	-28.4	181.3	February 2008	Eridania Basin	6344	2.298	0.007	2.503	0.003	3.484	0.002	1	2	Sulfates, Al phases			N=418	1	None (<0.1%) - 76 cubes
	FRT0865F	-32.9	182.8	October 2007	Eridania Basin	714	2.305	0.009	2.516	0.003	3.497	0.003	1	3	Sulfates				2	Tentative (0.1-0.2%) - 103 cubes
	FRT0A3FF	-36.4	178.7	March 2008	Eridania Basin	1226	2.305	0.008	2.503	0.004	3.464	0.003	1	3					3	Weak (0.3-1%) - 221 cubes
	FRT0920A	-28.2	56.7	January 2008	Hellas Basin	3308	2.305	0.011	2.53	0.003	x	x	1	1					4	Strong (<1%) - 18 cubes
	FRT06464	-28	65.5	June 2007	Hellas Basin	1751	2.305	0.011	2.53	0.003	3.504	0.001	1	2
	FRT085DB	-26.9	63.1	October 2007	Hellas Basin	6763	2.298	0.011	2.523	0.003	3.504	0.002	1	2
	FRT091B1	-27.3	78.4	December 2007	Hellas Basin	2048	2.305	0.012	2.516	0.003	3.464	0.002	1	2
	FRT1234E	-26.3	60.3	April 2009	Hellas Basin	2688	2.298	0.009	2.536	0.003	3.464	0.001	1	2
	HRL08D99	-28.9	78.3	December 2007	Hellas Basin	1729	2.298	0.012	2.516	0.003	3.497	0.002	1	2
	FRT0622B	-27.6	74.2	June 2007	Hellas Basin	1963	2.298	0.014	2.536	0.003	3.49	0.003	1	3
	FRT1258C	-25.9	63.8	April 2009	Hellas Basin	9740	2.298	0.016	2.523	0.003	3.504	0.003	1	3
	FRT059DF	-27.6	74.2	April 2007	Hellas Basin	485	2.298	0.01	2.53	0.003	3.484	0.001	1	2
	FRT07F4A	-27.8	60.5	September 2007	Hellas Basin	13349	2.305	0.012	2.516	0.004	3.484	0.001	1	2
	FRT13D40	-26.7	55.3	July 2009	Hellas Basin	6788	2.305	0.021	2.51	0.004	3.477	0.006	1	3
	FRT0643D	-27.2	60.3	June 2007	Hellas Basin	8400	2.311	0.017	2.53	0.004	3.504	0.001	1	2
	FRT084D6	-27.5	74.8	October 2007	Hellas Basin	296	2.298	0.018	2.536	0.004	3.457	0.002	1	2
	FRT08144	-26.4	68.5	October 2007	Hellas Basin	6663	2.318	0.02	2.53	0.005	3.504	0.001	1	2
	FRT092B4	-25.4	66.6	January 2008	Hellas Basin	1379	2.305	0.0153	2.51	0.0053	3.49	0.004	1	3
	FRT09CD7	-27.1	69.8	February 2008	Hellas Basin	4930	2.305	0.016	2.523	0.006	3.464	0.003	1	3
	FRT0CC60	-25.7	63.9	October 2008	Hellas Basin	1604	2.305	0.015	2.516	0.006	3.444	0.004	1	3
	HRL0D137	-27.1	66.7	October 2008	Hellas Basin	3917	2.305	0.015	2.503	0.006	3.444	0.004	1	3
	FRT1EB09	-27.4	60.6	June 2011	Hellas Basin	12675	2.311	0.024	2.516	0.007	x	x	1	1
	FRT096BE	-26.5	67.7	January 2008	Hellas Basin	17218	2.298	0.018	2.516	0.007	3.464	0.003	1	3	Al phases
	FRT14241	-27.2	60.4	August 2009	Hellas Basin	7376	2.305	0.031	2.523	0.008	3.49	0.007	1	3
	HRL0853D	33.7	17.1	October 2007	Ismenius	5537	2.291	0.024	2.516	0.007	3.484	0.01	1	4
	FRT05850	18.2	77.4	April 2007	Jezero	1129	2.305	0.008	2.503	0.004	3.484	0.001	1	2
	FRT047A3	18.6	77.5	February 2007	Jezero	14617	2.311	0.0089	2.51	0.009	3.477	0.005	1	3
	FRT12DE6	1.3	83.5	May 2009	Libya Montes	8912	2.311	0.01	2.51	0.003	3.437	0.005	1	3
	FRT0A377	3.8	82.3	March 2008	Libya Montes	2549	2.311	0.013	2.516	0.003	3.504	0.001	1	2
	FRT0A542	3.7	84.9	March 2008	Libya Montes	2282	2.305	0.006	2.523	0.003	3.457	0.005	1	3
	FRT03B63	3.6	84.1	January 2007	Libya Montes	3185	2.311	0.0076	2.51	0.0041	3.47	0.002	1	2
	FRT1754F	3.5	85.1	March 2010	Libya Montes	10503	2.311	0.012	2.51	0.006	x	x	1	1
	FRT0A909	4.6	82.2	April 2008	Libya Montes	5329	2.305	0.026	2.51	0.007	3.49	0.004	1	3
	FRT1647D	3.3	85	February 2010	Libya Montes	4043	2.311	0.017	2.51	0.007	3.47	0.006	1	3
	FRT18800	3.2	84.6	May 2010	Libya Montes	7890	2.311	0.024	2.516	0.007	3.45	0.006	1	3
	FRT0BDD9	0.4	83.6	August 2008	Libya Montes	8991	2.298	0.0184	2.516	0.008	3.497	0.005	1	3
	FRT0A55F	16.5	306.7	March 2008	Lunae Planum	3881	2.311	0.006	2.516	0.003	3.504	0.001	1	2
	FRT16676	-21.3	309.1	February 2010	Margaritifer Terra	3785	2.305	0.018	2.523	0.003	x	x	1	1
	FRT060DD	-23.8	326.5	June 2007	Margaritifer Terra	520	2.298	0.009	2.51	0.003	3.47	0.001	1	2
	FRT08076	-20.8	330.3	October 2010	Margaritifer Terra	2246	2.298	0.013	2.536	0.003	3.497	0.001	1	2
	FRT07B8F	-23.8	326.4	September 2007	Margaritifer Terra	176	2.298	0.006	2.516	0.003	3.497	0.003	1	3
	FRT08E5D	-25.7	311.4	December 2007	Margaritifer Terra	9280	2.305	0.013	2.523	0.003	3.484	0.004	1	3
	FRT1253F	-28.5	309.7	April 2009	Margaritifer Terra	1329	2.298	0.021	2.516	0.003	3.49	0.005	1	3
	FRT14721	-24.6	311.8	August 2009	Margaritifer Terra	4706	2.305	0.017	2.516	0.003	3.47	0.004	1	3
	FRT0474A	-26.7	325.5	Feb. 2007	Margaritifer Terra	341	2.305	0.007	2.516	0.003	3.45	0.002	1	2
	FRT18057	-25.5	312.6	April 2010	Margaritifer Terra	7171	2.298	0.025	2.51	0.004	x	x	1	1
	FRT04F2F	-27	325.5	March 2007	Margaritifer Terra	376	2.305	0.009	2.53	0.004	3.457	0.002	1	2
	HRS03207	-23.8	326.4	Nov. 2006	Margaritifer Terra	722	2.298	0.011	2.51	0.004	3.484	0.002	1	2
	FRT11728	-18.2	311.6	March 2009	Margaritifer Terra	4032	2.298	0.016	2.51	0.004	3.484	0.003	1	3
	FRT12ACC	-27.9	309	May 2009	Margaritifer Terra	3443	2.298	0.02	2.523	0.004	3.477	0.004	1	3
	FRT1D7AA	-2.3	340.8	March 2011	Margaritifer Terra	3364	2.305	0.02	2.516	0.004	3.497	0.004	1	3
	HRL09B61	-25.5	312.8	January 2008	Margaritifer Terra	2619	2.305	0.019	2.53	0.004	3.477	0.003	1	3
	FRT0AADE	-23.9	326.7	May 2008	Margaritifer Terra	461	2.298	0.011	2.51	0.005	x	x	1	1
	FRT12DFA	-28.5	309.5	May 2009	Margaritifer Terra	1816	2.298	0.023	2.51	0.005	3.477	0.006	1	3
	FRT1376C	-27.9	309	July 2009	Margaritifer Terra	5394	2.298	0.02	2.516	0.005	3.477	0.005	1	3
	HRL0AB96	-27.2	320.1	May 2008	Margaritifer Terra	385	2.298	0.02	2.523	0.005	3.497	0.009	1	3
	FRT168C0	-25.2	312.2	February 2010	Margaritifer Terra	4039	2.305	0.029	2.516	0.006	x	x	1	1
	FRT17C02	-10.4	341.8	April 2010	Margaritifer Terra	4037	2.311	0.027	2.503	0.006	x	x	1	1
	FRT1B8A9	-18.5	327.6	October 2010	Margaritifer Terra	2674	2.311	0.016	2.503	0.006	x	x	1	1
	FRT16FA5	-25.3	312.3	March 2010	Margaritifer Terra	3931	2.305	0.03	2.51	0.007	x	x	1	1
	FRT09172	-27	325.2	December 2007	Margaritifer Terra	455	2.305	0.014	2.516	0.007	3.457	0.006	1	3
	FRT0A0B7	-28.5	308.6	February 2008	Margaritifer Terra	871	2.298	0.012	2.51	0.007	3.49	0.009	1	3
	FRT1D9B1	-20	311.6	April 2011	Margaritifer Terra	7285	2.311	0.036	2.53	0.007	3.464	0.003	1	3
	FRT20387	-22.3	308.8	September 2011	Margaritifer Terra	21286	2.305	0.035	2.53	0.007	3.457	0.004	1	3
	FRT196B0	-6.3	334.4	June 2010	Margaritifer Terra	2204	2.311	0.03	2.516	0.009	3.45	0.008	1	3
	FRT0D02F	25.4	339.9	October 2008	Mawrth Vallis	4140	2.291	0.006	2.53	0.003	3.477	0.003	1	3	Al phases
	FRT0A8CE	18.1	349.2	April 2008	Mawrth Vallis	25854	2.291	0.007	2.516	0.004	3.497	0.004	1	3	Al phases, Sulfates
	FRT0B3B6	25.1	339.3	June 2008	Mawrth Vallis	683	2.285	0.007	2.516	0.004	3.477	0.005	1	3	Al phases, Sulfates
	FRT0BE5E	19.9	341.5	July 2008	Mawrth Vallis	6268	2.285	0.012	2.503	0.004	3.464	0.009	1	3	Al phases
	FRT16FFE	24.1	339.1	March 2010	Mawrth Vallis	2928	2.291	0.013	2.51	0.004	3.457	0.004	1	3	Al phases, Sulfates
	HRL043EC	24.7	339.1	February 2007	Mawrth Vallis	6045	2.291	0.0127	2.523	0.0043	x	x	1	1
	FRT17229	24.5	341.8	March 2010	Mawrth Vallis	1596	2.298	0.016	2.51	0.005	x	x	1	1	Al phases, Sulfates
	FRT0819B	17.8	345.5	October 2007	Mawrth Vallis	7928	2.291	0.011	2.503	0.005	3.457	0.001	1	2	Al phases, Sulfates
	FRT173F4	24.1	339.1	March 2010	Mawrth Vallis	3634	2.291	0.012	2.51	0.005	3.457	0.003	1	3	Al phases, Sulfates
	FRT181BF	18.1	349.1	April 2010	Mawrth Vallis	7857	2.291	0.012	2.516	0.005	3.497	0.005	1	3	Al phases, Sulfates
	FRT18627	25.6	338.8	April 2010	Mawrth Vallis	625	2.291	0.014	2.51	0.005	3.484	0.003	1	3
	FRT1BC7F	21.8	339.9	November 2010	Mawrth Vallis	2681	2.298	0.022	2.503	0.005	3.484	0.006	1	3
	FRT1EC38	23.9	340.6	June 2011	Mawrth Vallis	2753	2.291	0.011	2.503	0.005	3.497	0.004	1	3	Al phases, Sulfates
	FRT0D4EC	24.8	338.5	November 2008	Mawrth Vallis	3610	2.291	0.013	2.523	0.006	x	x	1	1	Al phases, Sulfates
	FRT2432F	19.8	342.5	April 2012	Mawrth Vallis	18379	2.291	0.018	2.51	0.006	x	x	1	1	Al phases
	FRT0A425	25.2	339.7	March 2008	Mawrth Vallis	8144	2.285	0.009	2.51	0.006	3.497	0.001	1	2	Al phases, Sulfates
	FRT03BFB	22.5	341.8	January 2007	Mawrth Vallis	4806	2.291	0.017	2.523	0.006	3.497	0.005	1	3	Al phases, Sulfates
	FRT08690	17.8	345.5	October 2007	Mawrth Vallis	9416	2.285	0.011	2.51	0.006	3.504	0.004	1	3	Al phases, Sulfates
	FRT0BF57	24.2	339	August 2008	Mawrth Vallis	49768	2.291	0.02	2.51	0.006	3.477	0.008	1	3	Al phases, Sulfates
	FRT0C467	22.3	342.5	August 2008	Mawrth Vallis	12990	2.291	0.017	2.51	0.006	3.45	0.005	1	3	Al phases, Sulfates
	FRT0C596	25	341	September 2008	Mawrth Vallis	6914	2.285	0.019	2.503	0.006	3.457	0.005	1	3	Al phases, Sulfates
	FRT16E2D	23.5	341.2	February 2010	Mawrth Vallis	6666	2.291	0.013	2.51	0.006	3.504	0.005	1	3
	HRS203B3	24.5	341.2	September 2011	Mawrth Vallis	4152	2.291	0.02	2.51	0.006	3.504	0.006	1	3	Al phases, Sulfates
	FRT20BF9	24.5	338.9	October 2011	Mawrth Vallis	10366	2.291	0.014	2.516	0.006	3.477	0.011	1	4	Al phases, Sulfates
	HRS0307A	22.8	341.7	November 2006	Mawrth Vallis	242	2.291	0.0256	2.503	0.0063	x	x	1	1
	FRT0AA7D	24.4	338.9	April 2008	Mawrth Vallis	51889	2.291	0.0178	2.503	0.0068	x	x	1	1	Al phases, Sulfates
	FRT04ECA	24.9	340.2	March 2007	Mawrth Vallis	17145	2.291	0.013	2.516	0.007	3.497	0.002	1	2	Al phases, Sulfates
	FRT23319	19.6	342.7	February 2012	Mawrth Vallis	29821	2.291	0.02	2.503	0.007	3.47	0.001	1	2
	FRT119DC	25.3	341.2	March 2009	Mawrth Vallis	10892	2.291	0.01	2.51	0.007	3.47	0.007	1	3	Al phases, Sulfates
	FRT1417C	18.1	349.2	August 2009	Mawrth Vallis	10728	2.291	0.012	2.523	0.007	3.47	0.005	1	3	Al phases, Sulfates
	FRT17639	23.9	342.6	March 2010	Mawrth Vallis	3171	2.291	0.016	2.516	0.007	3.47	0.007	1	3	Al phases, Sulfates
	HRL09A5F	25.2	340.2	January 2008	Mawrth Vallis	13618	2.285	0.014	2.51	0.007	3.504	0.004	1	3	Al phases, Sulfates
	FRT0B141	24	341	June 2008	Mawrth Vallis	24010	2.291	0.0129	2.503	0.0073	x	x	1	1	Al phases, Sulfates
	FRT089F7	24	341.1	November 2007	Mawrth Vallis	87355	2.291	0.015	2.503	0.008	x	x	1	1	Al phases, Sulfates
	HRL0AF78	26.8	341.2	June 2008	Mawrth Vallis	3891	2.291	0.021	2.503	0.008	x	x	1	1	Al phases
	FRT0B643	23.9	341.1	July 2008	Mawrth Vallis	38830	2.291	0.0223	2.503	0.008	3.497	0.002	1	2	Al phases, Sulfates
	FRT21D02	24.4	339	December 2011	Mawrth Vallis	16633	2.291	0.023	2.503	0.008	3.47	0.002	1	2	Al phases, Sulfates
	FRT0863E	24.7	339.1	October 2007	Mawrth Vallis	14190	2.291	0.008	2.51	0.008	3.504	0.003	1	3	Al phases, Sulfates
	FRT0C872	24.4	341.7	September 2008	Mawrth Vallis	2278	2.291	0.021	2.503	0.008	3.457	0.006	1	3	Al phases, Sulfates
	FRT1654F	22.5	343	February 2010	Mawrth Vallis	22939	2.291	0.013	2.516	0.008	3.504	0.004	1	3	Al phases, Sulfates
	FRT17816	26.7	340.5	March 2010	Mawrth Vallis	22455	2.291	0.022	2.51	0.008	3.497	0.003	1	3	Al phases, Sulfates
	FRT19AA0	23.9	341.5	July 2010	Mawrth Vallis	8546	2.291	0.032	2.51	0.009	x	x	1	1	Al phases, Sulfates
	FRT16931	25.4	339.9	February 2010	Mawrth Vallis	4274	2.291	0.017	2.51	0.009	3.49	0.003	1	3	Al phases, Sulfates
	FRT094F6	24.3	340.7	January 2008	Mawrth Vallis	12884	2.291	0.0184	2.51	0.0093	3.497	0.004	1	3	Al phases, Sulfates
	FRT247A0	21.3	337.4	April 2012	McLaughlin	4044	2.305	0.015	2.503	0.007	3.497	0.006	1	3
	FRT0410F	4	358.9	January 2007	Meridiani	8014	2.305	0.01	2.503	0.003	3.497	0.002	1	2	Sulfates
	FRT07B8B	-3.3	352.1	September 2007	Meridiani	227	2.305	0.006	2.53	0.003	3.49	0.002	1	2
	FRT099C8	2.8	0.1	January 2008	Meridiani	3024	2.305	0.017	2.516	0.003	3.45	0.001	1	2
	FRT0A1F3	1.9	357.6	February 2008	Meridiani	18697	2.298	0.005	2.51	0.003	3.484	0.001	1	2	Sulfates
	FRT0960F	3.9	359	January 2008	Meridiani	5562	2.305	0.005	2.523	0.003	3.477	0.001	1	2	Sulfates
	FRT097F8	1.8	357.6	January 2008	Meridiani	20230	2.298	0.006	2.503	0.003	3.49	0.001	1	2	Sulfates
	FRT0A063	-3.3	354.6	February 2008	Meridiani	2439	2.305	0.011	2.516	0.003	3.49	0.002	1	2	Sulfates
	FRT03CE0	1.3	0.1	January 2007	Meridiani	1958	2.305	0.008	2.503	0.003	3.49	0.004	1	3	Sulfates
	FRT0942E	0.3	1.6	January 2008	Meridiani	157	2.291	0.013	2.51	0.003	3.504	0.006	1	3
	FRT0979C	-3.3	352.3	January 2008	Meridiani	4599	2.298	0.013	2.53	0.004	3.497	0.001	1	2
	FRT0B2D0	-3.2	351.5	June 2008	Meridiani	477	2.298	0.011	2.516	0.004	x	x	1	1
	FRT09C02	-3.3	352.2	February 2008	Meridiani	8945	2.298	0.015	2.51	0.004	3.464	0.001	1	2
	FRT0AE19	-3.3	352.2	June 2008	Meridiani	16183	2.298	0.016	2.516	0.004	3.477	0.001	1	2
	FRT0A8F3	10.6	355.2	April 2008	Meridiani	4074	2.298	0.014	2.503	0.004	3.484	0.003	1	3
	FRT165AA	-5.6	354	February 2010	Meridiani	1384	2.311	0.017	2.516	0.004	3.45	0.006	1	3
	FRT08351	13.3	349.6	October 2007	Meridiani	1596	2.291	0.011	2.503	0.005	3.504	0.001	1	2
	FRT09554	-3	350.2	January 2008	Meridiani	17153	2.305	0.016	2.51	0.005	3.49	0.002	1	2
	FRT12ABB	2.4	359.9	May 2009	Meridiani	25454	2.298	0.011	2.523	0.006	x	x	1	1	Sulfates
	FRT06445	1.5	2.7	June 2007	Meridiani	1872	2.305	0.008	2.503	0.006	3.444	0.001	1	2	Sulfates
	FRT09ACE	-5.6	353.9	January 2008	Meridiani	14028	2.305	0.022	2.516	0.006	3.504	0.001	1	2
	HRS0513B	0.1	357.9	March 2007	Meridiani	2773	2.298	0.014	2.503	0.006	3.464	0.001	1	2
	FRT0C71F	-3	352.1	September 2008	Meridiani	6015	2.298	0.019	2.51	0.006	3.45	0.006	1	3
	FRT0B710	3.6	359	July 2008	Meridiani	19275	2.298	0.025	2.503	0.007	x	x	1	1	Sulfates
	FRT17946	3.6	359	March 2010	Meridiani	18939	2.298	0.021	2.503	0.007	x	x	1	1	Sulfates
	FRT0B084	3.9	359.1	June 2008	Meridiani	10852	2.305	0.027	2.503	0.007	3.504	0.007	1	3	Sulfates
	FRT10934	-5.1	354.6	January 2009	Meridiani	21436	2.311	0.034	2.53	0.007	3.484	0.003	1	3
	FRT18545	3.9	359.2	April 2010	Meridiani	4603	2.305	0.03	2.503	0.007	3.47	0.005	1	3	Sulfates
	FRT0BEF5	2.5	359.9	August 2008	Meridiani	21676	2.298	0.016	2.516	0.008	x	x	1	1	Sulfates
	FRT0A235	4.4	2.8	February 2008	Meridiani	810	2.305	0.008	2.523	0.008	3.504	0.003	1	3
	FRT16A23	-5.7	353.7	February 2010	Meridiani	4806	2.305	0.023	2.53	0.008	3.49	0.008	1	3
	FRT16EE8	-5.6	353.7	March 2010	Meridiani	3650	2.305	0.024	2.53	0.008	3.497	0.007	1	3
	FRT0A553	4.5	2.8	March 2008	Meridiani	1457	2.305	0.01	2.516	0.009	3.49	0.006	1	3
	HRL0CFB0	2.3	0.1	October 2008	Meridiani	10224	2.298	0.007	2.51	0.009	3.504	0.005	1	3	Sulfates
	FRT0A4B5	21	74.5	March 2008	Nili Fossae	13433	2.305	0.013	2.51	0.003	3.477	0.001	1	2
	FRT0406B	19	67.2	January 2007	Nili Fossae	3904	2.305	0.016	2.516	0.003	3.464	0.001	1	2
	FRT08FC1	21	74.5	December 2007	Nili Fossae	16109	2.305	0.012	2.51	0.003	3.477	0.002	1	2
	FRT08530	20.9	74.4	October 2007	Nili Fossae	3962	2.305	0.0103	2.523	0.0031	3.484	0.003	1	3
	FRT17C7D	23.7	68.6	April 2010	Nili Fossae	7385	2.298	0.018	2.503	0.004	x	x	1	1
	FRT0289E	19.4	74	October 2006	Nili Fossae	1973	2.311	0.012	2.503	0.004	3.484	0.001	1	2
	FRT034FE	19.1	68	December 2006	Nili Fossae	467	2.291	0.012	2.503	0.004	3.45	0.002	1	2
	FRT0C379	24.5	71	August 2008	Nili Fossae	8416	2.311	0.019	2.51	0.004	x	x	1	1
	HRL0D0C7	20.2	77.8	October 2008	Nili Fossae	18009	2.305	0.018	2.516	0.004	3.484	0.002	1	2
	FRT13EBC	19.1	75.6	July 2009	Nili Fossae	996	2.305	0.027	2.536	0.005	x	x	1	1
	FRT17ABA	18.8	71.9	April 2010	Nili Fossae	2398	2.305	0.017	2.51	0.005	3.477	0.002	1	2
	HRL09ABE	21.3	72.7	January 2008	Nili Fossae	7120	2.305	0.035	2.516	0.005	3.47	0.002	1	2
	FRT0821F	16.5	76.4	October 2007	Nili Fossae	196	2.305	0.005	2.523	0.005	3.49	0.004	1	3	Sulfates
	FRT0871C	21.9	77.1	October 2007	Nili Fossae	25232	2.305	0.024	2.523	0.005	3.484	0.003	1	3
	FRT1709C	22.7	71	March 2010	Nili Fossae	2513	2.305	0.012	2.51	0.005	3.477	0.003	1	3
	FRT16F2C	23	77.1	March 2010	Nili Fossae	4361	2.305	0.016	2.51	0.006	x	x	1	1
	FRT17736	19.7	80	March 2010	Nili Fossae	7412	2.305	0.013	2.516	0.006	x	x	1	1
	FRT050F2	15	72.1	March 2007	Nili Fossae	19162	2.305	0.016	2.523	0.006	3.504	0.001	1	2	Chlorites
	FRT08389	23.5	75.8	October 2007	Nili Fossae	17040	2.305	0.0119	2.503	0.006	3.497	0.002	1	2
	FRT0B012	21	74.6	June 2008	Nili Fossae	11428	2.305	0.017	2.516	0.006	3.504	0.002	1	2
	FRT0A4FC	22	77.2	March 2008	Nili Fossae	32765	2.305	0.036	2.523	0.006	3.45	0.005	1	3	Sulfates
	FRT0BBCB	21.2	72.7	July 2008	Nili Fossae	12346	2.305	0.035	2.516	0.006	3.497	0.005	1	3
	FRT1182A	18.6	77	March 2009	Nili Fossae	1405	2.305	0.007	2.516	0.006	3.477	0.005	1	3
	FRT18DCA	17.6	77.2	May 2010	Nili Fossae	5001	2.311	0.014	2.51	0.006	3.484	0.006	1	3
	HRS1EC8F	15.7	74.2	June 2011	Nili Fossae	2879	2.305	0.024	2.503	0.006	3.45	0.004	1	3
	HRL0AB0A	26.7	74.9	May 2008	Nili Fossae	23832	2.305	0.029	2.51	0.007	x	x	1	1
	FRT05F62	15	72.1	May 2007	Nili Fossae	16573	2.305	0.0154	2.523	0.007	3.464	0.001	1	2	Chlorites
	FRT07BC8	21.3	74.2	September 2007	Nili Fossae	19458	2.305	0.021	2.516	0.007	3.477	0.002	1	2
	FRT088D0	21.5	75.2	October 2007	Nili Fossae	28481	2.305	0.025	2.503	0.007	3.484	0.004	1	3
	FRT16655	19.7	80	February 2010	Nili Fossae	6077	2.305	0.014	2.503	0.007	3.497	0.006	1	3
	FRT17D42	19.7	80	April 2010	Nili Fossae	9064	2.305	0.014	2.516	0.007	3.497	0.006	1	3
	FRT0B438	22.2	77.2	June 2008	Nili Fossae	30170	2.305	0.039	2.516	0.008	x	x	1	1
	HRL0AC07	27.9	77.7	May 2008	Nili Fossae	24741	2.291	0.015	2.516	0.008	x	x	1	1
	HRL0D08F	23.2	72.9	October 2008	Nili Fossae	9977	2.311	0.031	2.53	0.008	x	x	1	1
	FRT0C5EA	23.2	72.9	September 2008	Nili Fossae	17607	2.311	0.035	2.523	0.008	3.484	0.002	1	2
	FRT048B2	16.5	76.6	March 2007	Nili Fossae	3061	2.305	0.014	2.51	0.008	3.457	0.003	1	3	Sulfates
	FRT05A3E	19.4	72.9	April 2007	Nili Fossae	30617	2.291	0.019	2.503	0.008	3.504	0.003	1	3
	FRT14836	21.7	70.5	August 2009	Nili Fossae	3092	2.305	0.016	2.503	0.008	3.457	0.007	1	3
	FRT1821C	17.6	77	April 2010	Nili Fossae	2031	2.305	0.026	2.503	0.008	3.497	0.008	1	3
	HRL17FA7	22.2	77.6	April 2010	Nili Fossae	14601	2.305	0.03	2.523	0.008	3.437	0.003	1	3
	FRT12149	20.8	78.5	April 2009	Nili Fossae	6128	2.311	0.011	2.503	0.009	x	x	1	1
	HRL06408	28.4	75.4	June 2007	Nili Fossae	22305	2.305	0.017	2.503	0.009	x	x	1	1
	HRL13FD3	17.2	73.1	July 2009	Nili Fossae	2607	2.298	0.018	2.51	0.009	x	x	1	1
	FRT0BFD1	23.1	76.1	August 2008	Nili Fossae	2208	2.311	0.034	2.51	0.009	3.484	0.005	1	3
	FRT161EF	17.9	77.1	January 2010	Nili Fossae	1327	2.311	0.012	2.51	0.009	3.47	0.003	1	3
	FRT16A73	17.8	76.9	February 2010	Nili Fossae	4899	2.305	0.011	2.51	0.009	3.497	0.007	1	3
	FRT16ED6	19.6	73.3	March 2010	Nili Fossae	5626	2.298	0.052	2.503	0.009	3.49	0.013	1	4
	FRT09318	-20.5	43.7	January 2008	Noachis Terra	1241	2.311	0.009	2.523	0.003	3.47	0.002	1	2
	FRT0A5A1	-26.5	39	March 2008	Noachis Terra	3016	2.311	0.01	2.516	0.003	3.47	0.003	1	3
	FRT13FAA	-23.9	46.6	July 2009	Noachis Terra	5615	2.311	0.024	2.516	0.003	3.457	0.004	1	3
	FRT0A22D	-31.3	34.1	February 2008	Noachis Terra	200	2.305	0.012	2.516	0.004	x	x	1	1
	FRT09665	-24.6	35.1	January 2008	Noachis Terra	1394	2.298	0.017	2.51	0.005	3.49	0.002	1	2
	FRT08F86	-39	300.3	December 2007	Ogygis Planum	9061	2.305	0.015	2.503	0.004	3.464	0.002	1	2
	FRT08438	16.7	336.9	October 2007	Oxia catchment	8791	2.291	0.013	2.53	0.0046	3.464	0.001	1	2	Al phases
	FRT10FE9	16.8	337	February 2009	Oxia catchment	3743	2.291	0.016	2.523	0.0056	3.47	0.001	1	2	Al phases
	FRT0810D	18.2	335.4	October 2010	Oxia Planum	16651	2.305	0.0151	2.523	0.005	3.464	0.001	1	2
	FRT09A16	17.7	336.1	January 2008	Oxia Planum	8159	2.305	0.0215	2.53	0.0055	3.457	0.001	1	2
	FRT0B001	-6.4	131.9	June 2008	Robert Sharp	4723	2.305	0.027	2.51	0.008	3.477	0.006	1	3
	FRT17CCB	-6	132	April 2010	Robert Sharp	1148	2.305	0.029	2.516	0.008	3.457	0.003	1	3
	FRT0C59B	43.5	309.5	September 2008	Tempe Terra	9171	2.305	0.019	2.51	0.007	3.457	0.001	1	2
	FRT0C6B4	43.4	309.2	September 2008	Tempe Terra	1030	2.305	0.014	2.516	0.007	3.484	0.009	1	3
	FRT0B147	43.4	309.5	June 2008	Tempe Terra	6885	2.305	0.018	2.53	0.008	3.45	0.006	1	3
	FRT0D036	43.4	309.8	October 2008	Tempe Terra	6963	2.305	0.021	2.503	0.008	3.464	0.003	1	3
	FRT0B3BC	42.3	309.9	June 2008	Tempe Terra	487	2.305	0.024	2.523	0.008	3.464	0.02	1	4
	FRT0B7CF	41.3	309.9	July 2008	Tempe Terra	1755	2.305	0.025	2.516	0.009	3.464	0.005	1	3
	FRT0BF5B	41.8	309.8	August 2008	Tempe Terra	7843	2.305	0.018	2.51	0.009	3.47	0.004	1	3
	FRT094C2	-28.8	179.7	January 2008	Terra Cimmeria	1008	2.305	0.045	2.51	0.003	3.49	0.005	1	3	Al phases
	FRT0A3B6	-9	143.2	March 2008	Terra Cimmeria	1345	2.311	0.019	2.523	0.004	3.477	0.002	1	2
	FRT16640	-18.4	166.9	February 2010	Terra Cimmeria	9869	2.311	0.023	2.503	0.007	3.504	0.007	1	3
	HRS0516F	2.8	57.5	April 2007	Terra Sabaea	651	2.298	0.0092	2.516	0.003	x	x	1	1
	FRT06377	-4	64.9	June 2007	Terra Sabaea	4731	2.305	0.015	2.523	0.003	3.49	0.001	1	2
	FRT09A4D	-2.6	65.5	January 2008	Terra Sabaea	2731	2.311	0.018	2.523	0.005	3.497	0.001	1	2
	FRT0862B	-4.9	65	October 2007	Terra Sabaea	602	2.311	0.013	2.51	0.005	3.49	0.004	1	3
	FRT07B32	-4.2	67.5	September 2007	Terra Sabaea	218	2.305	0.015	2.523	0.006	3.49	0.002	1	2
	FRT16A7C	-3.1	52	February 2010	Terra Sabaea	5130	2.298	0.018	2.516	0.006	3.47	0.003	1	3
	FRT06485	-4.2	67.4	June 2007	Terra Sabaea	3154	2.305	0.021	2.523	0.007	3.477	0.001	1	2
	FRT0B181	-3	69.3	June 2008	Terra Sabaea	881	2.305	0.023	2.503	0.007	3.497	0.004	1	3
	FRT1E211	-11.8	52	May 2011	Terra Sabaea	2104	2.311	0.019	2.523	0.007	3.464	0.005	1	3
	FRT064A8	-7.8	73.7	June 2007	Terra Sabaea	527	2.298	0.023	2.523	0.008	3.484	0.003	1	3
	FRT124B3	-11.6	51.9	April 2009	Terra Sabaea	2076	2.311	0.021	2.523	0.008	3.484	0.007	1	3
	FRT1EBA5	-11.8	52	June 2011	Terra Sabaea	5129	2.311	0.024	2.53	0.009	3.504	0.009	1	3
	FRT081B1	-33.3	216.4	October 2007	Terra Sirenum	3538	2.305	0.023	2.516	0.003	3.49	0.002	1	2	Chlorides
	FRT09349	-32.3	186.8	January 2008	Terra Sirenum	10404	2.305	0.026	2.51	0.005	3.484	0.001	1	2
	FRT09D2C	-33.1	216.4	February 2008	Terra Sirenum	3480	2.305	0.02	2.516	0.005	3.497	0.001	1	2	Chlorides
	HRL07C95	-32.7	206.3	September 2007	Terra Sirenum	5030	2.305	0.016	2.516	0.006	3.49	0.003	1	3
	HRL123D7	-32	207.7	April 2009	Terra Sirenum	3215	2.305	0.035	2.503	0.006	3.504	0.003	1	3
	FRT0A102	-32.7	205.9	February 2008	Terra Sirenum	650	2.298	0.019	2.51	0.009	3.504	0.006	1	3	Chlorides
	FRT12E44	-31.5	206.5	May 2009	Terra Sirenum	21583	2.305	0.05	2.523	0.009	3.477	0.003	1	3	Chlorides
	FRT1BB90	-31.5	194.4	November 2010	Terra Sirenum	1489	2.305	0.036	2.516	0.009	3.504	0.007	1	3	Chlorides
	FRT0A1B3	-25	301.2	February 2008	Thaumasia Planum	525	2.305	0.01	2.516	0.003	x	x	1	1
	FRT13C9C	-29.2	295.7	July 2009	Thaumasia Planum	22978	2.305	0.018	2.523	0.003	3.504	0.005	1	3
	FRT0849A	-28.3	293.3	October 2007	Thaumasia Planum	703	2.305	0.011	2.53	0.004	3.464	0.002	1	2
	HRS0A8D3	-22.3	299	April 2008	Thaumasia Planum	737	2.298	0.017	2.51	0.005	3.45	0.004	1	3
	HRL1B97C	-29.7	295.8	October 2010	Thaumasia Planum	1768	2.305	0.018	2.53	0.006	3.484	0.002	1	2
	FRT09DE2	-4.8	86.4	February 2008	Tyrrhena Terra	795	2.305	0.008	2.51	0.003	3.504	0.001	1	2
	FRT0825F	-8.8	86.5	October 2007	Tyrrhena Terra	815	2.305	0.006	2.536	0.003	3.457	0.002	1	2
	FRT0AB40	-7.9	84.3	May 2008	Tyrrhena Terra	3315	2.305	0.01	2.51	0.004	3.464	0.002	1	2
	FRT13FA4	-12.9	99.4	July 2009	Tyrrhena Terra	3667	2.305	0.013	2.523	0.005	3.49	0.002	1	2
	FRT13754	-10.6	81.7	July 2009	Tyrrhena Terra	511	2.305	0.024	2.53	0.005	3.49	0.003	1	3
	FRT185A9	-1.4	87	April 2010	Tyrrhena Terra	17161	2.305	0.014	2.503	0.005	3.464	0.003	1	3
	FRT14005	-10.3	81.8	July 2009	Tyrrhena Terra	2362	2.298	0.035	2.523	0.007	3.504	0.005	1	3
	FRT1B69F	-3	84	October 2010	Tyrrhena Terra	752	2.311	0.017	2.503	0.007	3.437	0.007	1	3
	FRT237D1	-5.1	88.8	March 2012	Tyrrhena Terra	4096	2.305	0.019	2.503	0.007	3.504	0.006	1	3
	FRT24086	-10	82.5	March 2012	Tyrrhena Terra	1505	2.305	0.022	2.536	0.009	x	x	1	1
	FRT063C5	-13.3	294	June 2007	Valles Marineris	3256	2.305	0.007	2.51	0.003	3.504	0.001	1	2
	FRT0823A	-7.3	277.1	October 2007	Valles Marineris	1268	2.285	0.005	2.516	0.003	3.457	0.002	1	2
	FRT09804	-14	304.4	January 2008	Valles Marineris	5634	2.305	0.009	2.53	0.003	3.484	0.001	1	2
	FRT09B24	-14.1	306.2	January 2008	Valles Marineris	1832	2.305	0.014	2.51	0.003	3.497	0.001	1	2
	HRL080CB	-9.8	306.6	October 2007	Valles Marineris	271	2.298	0.016	2.53	0.003	3.484	0.002	1	2
	FRT09DB4	-14.1	306.6	February 2008	Valles Marineris	5661	2.305	0.012	2.51	0.0036	3.464	0.003	1	3
	FRT1FB4F	-15.3	301.2	August 2011	Valles Marineris	14353	2.298	0.023	2.516	0.005	3.49	0.002	1	2
	FRT08FE7	-14	302.8	December 2007	Valles Marineris	3467	2.298	0.01	2.53	0.006	3.504	0.002	1	2
	FRT085A4	-7.9	278.1	October 2007	Valles Marineris	5534	2.298	0.011	2.53	0.007	3.49	0.006	1	3
	HRL1B8AE	-15.3	301.2	October 2010	Valles Marineris	1260	2.298	0.033	2.51	0.007	3.504	0.005	1	3	Al phases
	HRL0A8F6	-15.2	303.4	April 2008	Valles Marineris	778	2.305	0.013	2.51	0.009	x	x	1	1	Hyd Silica
	FRT0922E	-7.9	278	January 2008	Valles Marineris	3861	2.298	0.012	2.53	0.009	3.497	0.004	1	3
	FRT09CAE	23.1	336.1	February 2008	W Mawrth	605	2.291	0.008	2.516	0.003	3.45	0.002	1	2
	FRT0B60C	26.3	335.2	July 2008	W Mawrth	368	2.305	0.007	2.503	0.003	3.47	0.003	1	3
	FRT0BB21	26.1	335	July 2008	W Mawrth	1390	2.311	0.021	2.516	0.004	3.484	0.008	1	3
	FRT11AEA	24.2	334	March 2009	W Mawrth	508	2.305	0.013	2.503	0.006	3.497	0.003	1	3
	FRT0C674	24.2	334	September 2008	W Mawrth	308	2.305	0.035	2.51	0.009	3.477	0.007	1	3
	FRT0A605	10	317.5	March 2010	Xanthe Terra	633	2.298	0.0049	2.503	0.0026	3.497	0.003	1	3
	HRL07FF1	-7.6	318.7	October 2007	Xanthe Terra	191	2.305	0.008	2.523	0.003	3.47	0.002	1	2
	FRT0949A	-3.9	312.4	January 2008	Xanthe Terra	2922	2.298	0.019	2.516	0.005	3.504	0.002	1	2
	FRT0A280	-1.4	313.4	February 2008	Xanthe Terra	1980	2.298	0.021	2.51	0.006	3.457	0.001	1	2
	FRT08EBF	-2.2	313.3	December 2007	Xanthe Terra	2495	2.298	0.014	2.536	0.006	3.49	0.004	1	3
	FRT21D05	-11.3	317.1	December 2011	Xanthe Terra	2283	2.311	0.019	2.523	0.009	3.49	0.009	1	3
	HRL0834B	35.9	14.4	October 2007	Deuteronilus	4126	2.291	0.0139	2.503	0.0136	3.464	0.004	2	3
	FRT0CB3A	-25.7	66.5	September 2008	Hellas Basin	4581	2.298	0.018	2.53	0.01	3.477	0.006	2	3
	FRT1689A	-24.4	61.4	February 2010	Hellas Basin	6267	2.298	0.033	2.51	0.012	3.47	0.011	2	4
	FRT0989C	-27.6	65.7	January 2008	Hellas Basin	26645	2.311	0.0296	2.516	0.0127	3.477	0.004	2	3
	FRT21B76	-26.4	64.6	December 2011	Hellas Basin	12637	2.311	0.034	2.503	0.015	x	x	2	1
	FRT0C58A	-26.4	68.5	September 2008	Hellas Basin	6327	2.311	0.036	2.523	0.017	3.484	0.011	2	4
	FRT05C5E	18.5	77.4	May 2007	Jezero	5778	2.311	0.0094	2.51	0.0115	3.49	0.003	2	3
	FRT19568	2.7	84.7	June 2010	Libya Montes	2686	2.311	0.031	2.516	0.01	3.45	0.004	2	3
	HRS047D8	3.2	85	February 2007	Libya Montes	2436	2.305	0.0217	2.51	0.0105	3.477	0.004	2	3
	FRT0A819	3.5	85	April 2008	Libya Montes	22392	2.311	0.0142	2.51	0.011	3.484	0.005	2	3
	FRT1802B	3.5	84.7	April 2010	Libya Montes	1374	2.311	0.031	2.53	0.011	3.484	0.007	2	3
	FRT18EBA	-29.5	321.8	May 2010	Margaritifer Terra	1297	2.305	0.038	2.51	0.01	x	x	2	1
	HRL1B6E4	-5.1	339.6	October 2010	Margaritifer Terra	3891	2.311	0.035	2.516	0.01	x	x	2	1
	FRT1406E	-10.2	338	August 2009	Margaritifer Terra	12565	2.311	0.055	2.516	0.01	3.497	0.005	2	3
	HRL11EA6	-3.1	340.8	April 2009	Margaritifer Terra	783	2.305	0.023	2.523	0.01	3.464	0.004	2	3
	FRT0C875	-29.4	321.5	September 2008	Margaritifer Terra	1962	2.298	0.034	2.523	0.011	x	x	2	1
	FRT0ABB5	-27.4	324.7	May 2008	Margaritifer Terra	1914	2.305	0.025	2.503	0.011	3.504	0.009	2	3
	HRL139F6	-4.9	339.5	July 2009	Margaritifer Terra	2936	2.311	0.045	2.51	0.011	3.504	0.007	2	3
	FRT18922	-29.4	321.7	May 2010	Margaritifer Terra	2809	2.305	0.034	2.516	0.011	x	x	2	1
	FRT243D4	-20.5	330.9	April 2012	Margaritifer Terra	2032	2.318	0.03	2.516	0.012	x	x	2	1
	FRT18826	-11.2	336.3	May 2010	Margaritifer Terra	11753	2.311	0.048	2.516	0.013	x	x	2	1
	FRT24626	-19.7	322.3	April 2012	Margaritifer Terra	2914	2.305	0.044	2.503	0.013	3.484	0.01	2	4
	FRT18CA4	-25.4	312.5	May 2010	Margaritifer Terra	5201	2.298	0.042	2.516	0.014	x	x	2	1
	FRT0AB54	-28.3	309.8	May 2008	Margaritifer Terra	1788	2.298	0.024	2.51	0.014	3.49	0.008	2	3
	FRT14718	-9.1	337.8	August 2009	Margaritifer Terra	12154	2.311	0.077	2.53	0.015	3.497	0.005	2	3
	FRT19483	-7.9	343.2	June 2010	Margaritifer Terra	5536	2.311	0.051	2.523	0.015	3.497	0.011	2	4
	FRT18AF5	-3	339.1	May 2010	Margaritifer Terra	4765	2.305	0.052	2.523	0.0173	3.497	0.011	2	4
	FRT0B5C3	-28.5	309.5	July 2008	Margaritifer Terra	2504	2.298	0.035	2.516	0.018	x	x	2	1
	FRT21E6D	24.4	338.8	December 2011	Mawrth Vallis	4764	2.291	0.03	2.503	0.01	3.457	0.002	2	2	Al phases, Sulfates
	FRT0848D	24.8	341.2	October 2007	Mawrth Vallis	19861	2.291	0.013	2.516	0.01	3.49	0.003	2	3	Al phases, Sulfates
	FRT1D803	19.8	342.4	March 2011	Mawrth Vallis	13745	2.291	0.011	2.503	0.01	3.477	0.003	2	3
	FRT1DB03	19.7	342.7	April 2011	Mawrth Vallis	29945	2.291	0.013	2.503	0.01	3.49	0.004	2	3
	FRT109E0	24.5	338.9	January 2009	Mawrth Vallis	7648	2.298	0.025	2.503	0.01	x	x	2	1	Al phases, Sulfates
	FRT129CF	26.1	341.6	May 2009	Mawrth Vallis	10073	2.291	0.015	2.503	0.01	x	x	2	1	Al phases, Sulfates
	FRT117BB	24.2	341.4	March 2009	Mawrth Vallis	31018	2.291	0.013	2.51	0.01	3.45	0.004	2	3	Al phases, Sulfates
	FRT21BCB	24.1	340.9	December 2011	Mawrth Vallis	6597	2.291	0.017	2.51	0.01	3.484	0.004	2	3	Al phases, Sulfates
	FRT0A600	24.1	341.2	March 2008	Mawrth Vallis	31164	2.291	0.0266	2.503	0.0106	3.504	0.001	2	2	Al phases, Sulfates
	FRT09326	23	341.6	January 2008	Mawrth Vallis	45573	2.291	0.0257	2.503	0.0107	3.497	0.004	2	3	Al phases, Sulfates
	FRT0AAA8	27.3	342.5	April 2008	Mawrth Vallis	2907	2.305	0.0235	2.516	0.0107	3.49	0.006	2	3
	FRT0A2C2	23.4	342.3	February 2008	Mawrth Vallis	11027	2.291	0.028	2.503	0.0109	3.504	0.001	2	2	Al phases, Sulfates
	FRT0C18E	24.6	341	August 2008	Mawrth Vallis	37106	2.291	0.027	2.503	0.011	3.497	0.004	2	3	Al phases, Sulfates
	FRT13E49	23	341.5	July 2009	Mawrth Vallis	16930	2.298	0.021	2.503	0.011	3.49	0.005	2	3	Al phases, Sulfates
	FRT1903B	23.3	340	May 2010	Mawrth Vallis	9985	2.291	0.036	2.503	0.011	3.49	0.008	2	3
	FRT19759	23.9	341.3	June 2010	Mawrth Vallis	13090	2.291	0.03	2.51	0.011	3.497	0.008	2	3	Al phases, Sulfates
	FRT0A955	23.2	342.4	April 2008	Mawrth Vallis	214667	2.291	0.0228	2.503	0.0114	3.504	0.001	2	2	Al phases, Sulfates
	FRT098F7	23.2	342.3	January 2008	Mawrth Vallis	81818	2.291	0.0306	2.503	0.0116	3.497	0.004	2	3	Al phases, Sulfates
	FRT08838	20	342.6	October 2007	Mawrth Vallis	68254	2.291	0.019	2.503	0.012	3.504	0.002	2	2	Al phases, Sulfates
	FRT08F1A	23.3	342.4	December 2007	Mawrth Vallis	162057	2.291	0.028	2.503	0.012	3.504	0.002	2	2	Al phases
	FRT12D3C	24.6	341.6	May 2009	Mawrth Vallis	9888	2.291	0.019	2.503	0.014	3.47	0.002	2	2	Al phases, Sulfates
	FRT12B5F	26.6	340.5	May 2009	Mawrth Vallis	12385	2.291	0.018	2.51	0.015	x	x	2	1	Al phases, Sulfates
	FRT12E72	24.5	341.6	May 2009	Mawrth Vallis	8891	2.291	0.024	2.51	0.016	3.45	0.006	2	3	Al phases, Sulfates
	FRT0C42E	21.7	337.4	August 2008	McLaughlin	2183	2.311	0.0302	2.503	0.0152	3.497	0.01	2	4
	FRT0A5AA	21.7	337.8	March 2008	McLaughlin	10213	2.298	0.0276	2.503	0.0154	3.457	0.006	2	3
	FRT0A27C	21.7	337.8	February 2008	McLaughlin	7571	2.298	0.0281	2.503	0.0157	3.47	0.005	2	3
	FRT0BD84	-3.4	352.2	July 2008	Meridiani	5876	2.305	0.042	2.516	0.011	3.437	0.008	2	3
	FRT17030	1.9	123.1	March 2010	Nepenthes	141	2.298	0.024	2.523	0.012	3.444	0.013	2	4
	HRL0B404	21.9	72.3	June 2008	Nili Fossae	7742	2.305	0.035	2.516	0.01	3.49	0.004	2	3
	FRT09971	22	74.6	January 2008	Nili Fossae	12315	2.305	0.032	2.523	0.01	3.484	0.002	2	2	Al phases
	FRT064D9	21.2	74.2	June 2007	Nili Fossae	6167	2.305	0.049	2.516	0.01	3.484	0.007	2	3
	FRT095FE	20.1	78.6	January 2008	Nili Fossae	6803	2.311	0.019	2.523	0.01	3.49	0.004	2	3
	FRT0D6D6	23.1	73.3	November 2008	Nili Fossae	14335	2.305	0.063	2.51	0.01	3.457	0.007	2	3
	FRT0C79D	24.8	80.4	September 2008	Nili Fossae	4301	2.298	0.016	2.503	0.011	x	x	2	1
	FRT09D44	20.1	73.7	February 2008	Nili Fossae	14799	2.305	0.045	2.53	0.011	3.484	0.006	2	3
	FRT128D0	17.4	76.9	May 2009	Nili Fossae	455	2.305	0.009	2.51	0.011	x	x	2	1	Sulfates
	HRL2422E	17.2	77.5	April 2012	Nili Fossae	2558	2.311	0.017	2.51	0.011	x	x	2	1
	FRT09D96	20.3	78.6	February 2008	Nili Fossae	16730	2.305	0.02	2.523	0.011	3.49	0.005	2	3
	FRT0AA03	21.3	78.5	April 2008	Nili Fossae	1949	2.305	0.021	2.51	0.011	3.457	0.004	2	3
	FRT0ABCB	20.9	73.3	May 2008	Nili Fossae	3545	2.311	0.025	2.51	0.011	3.477	0.007	2	3	Al phases
	FRT0C968	21.7	79	September 2008	Nili Fossae	5006	2.305	0.016	2.523	0.011	3.457	0.004	2	3
	FRT165F7	17.8	77.2	February 2010	Nili Fossae	2103	2.311	0.014	2.51	0.011	3.47	0.004	2	3
	FRT17103	17.8	77	March 2010	Nili Fossae	3489	2.311	0.012	2.51	0.011	3.49	0.006	2	3
	FRT174F4	17.8	77	March 2010	Nili Fossae	4168	2.311	0.012	2.51	0.011	3.504	0.005	2	3
	FRT19538	17.7	76.8	June 2010	Nili Fossae	17486	2.305	0.024	2.51	0.011	3.457	0.005	2	3
	HRL0A8EC	29.1	73.4	April 2008	Nili Fossae	10357	2.291	0.0223	2.503	0.0112	x	x	2	1
	FRT0BEC0	20.6	73.8	August 2008	Nili Fossae	2448	2.298	0.046	2.503	0.012	x	x	2	1
	FRT0527D	29.3	73.3	April 2007	Nili Fossae	1442	2.291	0.014	2.503	0.012	3.497	0.005	2	3
	FRT097E2	19.2	76.4	January 2008	Nili Fossae	12043	2.305	0.025	2.523	0.012	3.49	0.004	2	3
	FRT0A053	22.4	74.3	February 2008	Nili Fossae	37111	2.305	0.038	2.523	0.012	3.49	0.009	2	3	Al phases
	FRT1642E	17.9	77.2	February 2010	Nili Fossae	1946	2.311	0.012	2.503	0.012	3.464	0.006	2	3
	HRL11336	22.6	76.9	February 2009	Nili Fossae	6852	2.311	0.036	2.51	0.012	3.477	0.004	2	3
	FRT1FD76	22.3	74.3	August 2011	Nili Fossae	10035	2.305	0.03	2.523	0.012	3.504	0.01	2	4
	FRT093BE	19.2	76.4	January 2008	Nili Fossae	14531	2.305	0.027	2.51	0.013	3.484	0.004	2	3
	FRT0BEEB	21.7	78.9	August 2008	Nili Fossae	5395	2.311	0.021	2.51	0.013	3.484	0.005	2	3
	FRT19DAA	17.5	76.5	July 2010	Nili Fossae	12288	2.305	0.033	2.503	0.013	3.504	0.008	2	3	Sulfates
	HRS0B6A2	22.4	74.9	July 2008	Nili Fossae	10456	2.311	0.044	2.503	0.013	3.504	0.005	2	3
	FRT0A9BE	19.6	73	April 2008	Nili Fossae	29934	2.291	0.034	2.503	0.014	3.49	0.005	2	3
	FRT13D3B	17	77.2	July 2009	Nili Fossae	2421	2.305	0.015	2.523	0.014	3.497	0.006	2	3
	FRT23565	16.9	77.6	February 2012	Nili Fossae	2216	2.311	0.022	2.51	0.014	3.49	0.005	2	3
	HRL095A2	19.6	73.9	January 2008	Nili Fossae	3255	2.305	0.04	2.523	0.014	3.477	0.008	2	3
	FRT0C256	20.4	78.5	August 2008	Nili Fossae	10802	2.305	0.028	2.503	0.015	x	x	2	1
	FRT03FB9	21.3	78.6	January 2007	Nili Fossae	7851	2.305	0.026	2.516	0.015	3.464	0.004	2	3
	FRT0C202	21.3	73.4	August 2008	Nili Fossae	1300	2.305	0.066	2.51	0.015	3.504	0.007	2	3
	FRT21C5A	21.4	74.4	December 2011	Nili Fossae	5385	2.305	0.052	2.523	0.015	3.497	0.013	2	4
	FRT199C7	17.6	76.6	July 2010	Nili Fossae	20500	2.305	0.041	2.51	0.016	x	x	2	1
	FRT0A09C	21.3	78.5	February 2008	Nili Fossae	4041	2.305	0.025	2.51	0.016	3.457	0.005	2	3
	FRT1792C	21.5	78.5	March 2010	Nili Fossae	4475	2.311	0.023	2.523	0.016	3.49	0.003	2	3
	HRL0CC16	21.7	78.8	September 2008	Nili Fossae	12831	2.305	0.025	2.51	0.016	3.49	0.005	2	3
	FRT186FA	19.8	72.3	May 2010	Nili Fossae	7733	2.311	0.041	2.503	0.016	3.477	0.023	2	4
	FRT0857F	21.9	78.5	October 2007	Nili Fossae	23989	2.305	0.025	2.51	0.017	3.457	0.005	2	3
	FRT18524	21.7	78.5	April 2010	Nili Fossae	4516	2.305	0.035	2.523	0.017	3.504	0.006	2	3
	FRT23728	17.3	76.8	March 2012	Nili Fossae	30167	2.305	0.041	2.51	0.019	x	x	2	1
	FRT0BDA8	17.2	76.5	July 2008	Nili Fossae	4172	2.311	0.032	2.51	0.019	3.457	0.009	2	3
	FRT03584	21.9	78.2	December 2006	Nili Fossae	12678	2.305	0.037	2.51	0.02	3.477	0.006	2	3
	FRT136F4	-24.3	45.9	July 2009	Noachis Terra	15753	2.305	0.035	2.516	0.01	3.497	0.004	2	3
	FRT17720	-20	168.1	March 2010	Terra Cimmeria	7805	2.311	0.04	2.516	0.012	3.49	0.004	2	3
	FRT177E9	-27	178.5	March 2010	Terra Cimmeria	8383	2.305	0.041	2.51	0.013	x	x	2	1
	HRL0C85F	0.5	66.2	September 2008	Terra Sabaea	1372	2.305	0.04	2.523	0.018	3.497	0.008	2	3
	HRL12FE5	-32.1	205.2	June 2009	Terra Sirenum	2646	2.305	0.042	2.51	0.01	3.504	0.004	2	3
	HRL13891	-31.1	185.9	July 2009	Terra Sirenum	624	2.305	0.056	2.536	0.01	3.47	0.006	2	3
	FRT09AAA	-33.4	216.2	January 2008	Terra Sirenum	8714	2.305	0.045	2.516	0.011	3.497	0.004	2	3	Chlorides
	FRT0A941	-32.7	205.9	April 2008	Terra Sirenum	449	2.298	0.024	2.51	0.011	3.484	0.006	2	3	Chlorides
	FRT0A253	-31.8	202.7	February 2008	Terra Sirenum	8936	2.305	0.048	2.516	0.012	x	x	2	1	Chlorides
	FRT21D16	-28.6	183.5	December 2011	Terra Sirenum	23203	2.305	0.058	2.523	0.012	x	x	2	1
	HRL16C19	-28.4	185.9	February 2010	Terra Sirenum	2682	2.305	0.054	2.51	0.012	x	x	2	1
	HRL12DD6	-29.8196	195.6	May 2009	Terra Sirenum	7316	2.305	0.056	2.503	0.012	3.47	0.004	2	3
	HRL0D002	-32.9	206.5	October 2008	Terra Sirenum	1670	2.305	0.039	2.51	0.015	x	x	2	1
	HRL1EB24	-31.3	202.7	June 2011	Terra Sirenum	2899	2.305	0.072	2.523	0.017	3.504	0.009	2	3
	FRT040DB	-40.8	249.8	January 2007	Thaumasia Planum	4506	2.311	0.0181	2.523	0.011	3.437	0.003	2	3
	FRT18154	-29.6	295.8	April 2010	Thaumasia Planum	5746	2.305	0.033	2.51	0.013	x	x	2	1
	FRT2438A	-22.6	298.8	April 2012	Thaumasia Planum	12985	2.298	0.043	2.516	0.014	x	x	2	1
	FRT179EA	-11.2	92.3	April 2010	Tyrrhena Terra	5469	2.305	0.026	2.523	0.01	3.49	0.007	2	3
	HRL082E8	-15.8	96.9	October 2007	Tyrrhena Terra	444	2.311	0.023	2.523	0.011	3.504	0.005	2	3
	FRT16D21	-15.7	84.7	February 2010	Tyrrhena Terra	3067	2.311	0.033	2.516	0.012	x	x	2	1
	FRT18B2E	-13.4	93.9	May 2010	Tyrrhena Terra	2650	2.305	0.031	2.51	0.013	x	x	2	1
	HRL1B827	-13.4	93.5	October 2010	Tyrrhena Terra	3848	2.318	0.037	2.51	0.016	3.504	0.007	2	3
	FRT09B27	-7.3	276.8	January 2008	Valles Marineris	1142	2.298	0.013	2.51	0.01	3.477	0.005	2	3
	FRT0B8E2	-13.9	304.3	July 2008	Valles Marineris	3128	2.305	0.025	2.51	0.011	x	x	2	1
	HRL040FF	18.5	77.4	January 2007	Jezero	3764	2.311	0.02	2.51	0.028	3.45	0.003	3	3
	FRT1957D	19.5	305.6	June 2010	Lunae Planum	9312	2.311	0.0466	2.503	0.0241	3.464	0.015	3	4
	FRT0CBE5	17.3	76.4	September 2008	Nili Fossae	8362	2.311	0.044	2.516	0.021	3.497	0.008	3	3
	FRT0C62B	21.7	78.8	September 2008	Nili Fossae	9975	2.305	0.035	2.523	0.022	3.477	0.007	3	3
	HRL0B8C2	17.3	77.1	July 2008	Nili Fossae	17493	2.305	0.022	2.51	0.022	3.47	0.005	3	3
	FRT1B615	19.6	72.4	October 2010	Nili Fossae	1515	2.305	0.051	2.503	0.022	3.49	0.012	3	4
	FRT028BA	20.5	78.5	October 2006	Nili Fossae	22146	2.311	0.033	2.51	0.024	3.477	0.006	3	3
	FRT0B072	21.9	78.4	June 2008	Nili Fossae	4607	2.298	0.043	2.503	0.024	3.484	0.014	3	4
	FRT03E12	22.3	77.1	January 2007	Nili Fossae	20306	2.311	0.0323	2.51	0.025	3.457	0.002	3	2
	FRT24C1A	17.4	76.7	May 2012	Nili Fossae	9569	2.311	0.04	2.51	0.029	3.484	0.01	3	4
	HRL23FCC	-8.4	71.6	March 2012	Terra Sabaea	614	2.311	0.042	2.523	0.022	x	x	3	1
	FRT0AB81	-31.6	206.4	May 2008	Terra Sirenum	21405	2.305	0.072	2.516	0.021	x	x	3	1	Chlorides
	FRT1747D	-28.9	187.1	March 2010	Terra Sirenum	19984	2.311	0.086	2.503	0.026	x	x	3	1
	x418

## Sheet: No 2.5 (122)
	Label	Lat	Lon	Date	Region	ROIs	BC23	BD23	Carb1	Others Phases?
	FRT04585	-37.2	164.1	February 2007	Terra Cimmeria	1008	2.305	0.011	0
	FRT04FE8	0.5	359	March 2007	Meridiani	694	2.305	0.005	0	Sulfates
	FRT06246	-27	325.5	June 2007	Margaritifer Terra	88	2.305	0.011	0
	FRT0656E	-35	173.8	June 2007	Eridania Basin	654	2.311	0.01	0	Sulfates
	FRT07AF6	-7.5	314.1	September 2007	Xanthe Terra	66	2.298	0.005	0
	FRT07C54	-34.9	174.2	September 2007	Eridania Basin	331	2.311	0.008	0
	FRT07F7E	-34.5	174.5	September 2007	Eridania Basin	1256	2.311	0.009	0
	FRT08038	-23.9	326.8	Oct. 2007	Margaritifer Terra	197	2.298	0.006	0
	FRT0805E	-23.8	79.9	October 2007	Hellas Basin	131	2.298	0.009	0
	FRT080F7	-4.6	87.4	October 2007	Tyrrhena Terra	30	2.305	0.007	0
	FRT0815B	-1.3	315.8	October 2007	Xanthe Terra	1632	2.298	0.009	0
	FRT08377	-37	164.5	October 2007	Terra Cimmeria	631	2.311	0.01	0	Sulfates
	FRT084FA	-38.9	300.3	October 2007	Ogygis Planum	438	2.291	0.013	0
	FRT08541	-2.4	354.7	October 2007	Meridiani	498	2.298	0.005	0	Sulfates
	FRT085EC	0.5	4.6	October 2007	Meridiani	14837	2.311	0.005	0	Sulfates
	FRT08C90	-35.4	173.2	December 2007	Eridania Basin	3545	2.311	0.01	0	Sulfates
	FRT08CF6	-21.4	67.2	December 2007	Hellas Basin	365	2.298	0.007	0
	FRT08F60	-18.5	102.4	December 2007	Tyrrhena Terra	889	2.305	0.01	0
	FRT09100	-20.3	40.4	December 2007	Noachis Terra	785	2.305	0.011	0
	FRT09106	3.7	10.2	December 2007	Meridiani	26690	2.298	0.005	0
	FRT0913A	-34	184	December 2007	Eridania Basin	300	2.305	0.007	0	Sulfates
	FRT091C5	-3.4	354.6	December 2007	Meridiani	1804	2.305	0.008	0	Sulfates
	FRT091EB	-37.5	194.3	January 2008	Terra Sirenum	2201	2.311	0.01	0	Al phases
	FRT092F7	-28.4	181.2	January 2008	Eridania Basin	8615	2.298	0.01	0	Sulfates, Al phases
	FRT0931E	-1	14.3	January 2008	Schiaparelli	604	2.305	0.005	0	Sulfates
	FRT09380	-20.3	327.3	January 2008	Margaritifer Terra	1163	2.305	0.005	0
	FRT0943D	-13.3	308.2	January 2008	Valles Marineris	495	2.305	0.006	0
	FRT0947F	-27.9	65.1	January 2008	Hellas Basin	407	2.305	0.009	0
	FRT0959A	8.5	102.6	January 2008	N Amenthes	737	2.311	0.006	0
	FRT095EE	-5.1	137.2	January 2008	Gale	1935	2.298	0.005	0	Sulfates
	FRT096DA	24.9	339.6	January 2008	Mawrth Vallis	2531	2.298	0.005	0
	FRT097C5	-37.5	194.3	January 2008	Terra Sirenum	1308	2.311	0.01	0	Al phases
	FRT098D1	-28.8	180.1	January 2008	Eridania Basin	2061	2.305	0.006	0
	FRT09A8D	-27.2	73.8	January 2008	Hellas Basin	1614	2.298	0.005	0	Sulfates
	FRT09B1C	21	358.8	January 2008	Meridiani	1985	2.305	0.009	0	Sulfates
	FRT09BBC	-28.6	181.1	February 2008	Eridania Basin	11304	2.298	0.008	0	Sulfates, Al phases
	FRT09C06	-23.7	326.4	February 2008	Margaritifer Terra	843	2.298	0.007	0
	FRT09D7E	-23.3	194.1	February 2008	Terra Sirenum	2635	2.305	0.013	0	Al phases
	FRT09DEE	0.8	4.2	February 2008	Meridiani	22986	2.305	0.005	0	Sulfates
	FRT0A0D1	-35	173.8	February 2008	Eridania Basin	2949	2.311	0.006	0	Sulfates
	FRT0A106	-37.2	178.6	February 2008	Eridania Basin	961	2.311	0.024	0
	FRT0A2B8	-20.2	43	February 2008	Noachis Terra	580	2.311	0.01	0
	FRT0A30C	-23.9	326.7	March 2008	Margaritifer Terra	620	2.298	0.007	0
	FRT0A923	-35.1	173.6	April 2008	Eridania Basin	2779	2.311	0.01	0	Sulfates
	FRT0AA81	-1	314	April 2008	Xanthe Terra	1778	2.305	0.01	0	Al phases
	FRT0AB32	-23.3	194.1	May 2008	Terra Sirenum	835	2.305	0.01	0	Al phases
	FRT0AC85	-1	314	May 2008	Xanthe Terra	2797	2.305	0.01	0	Al phases
	FRT0ADA1	-28.4	181.3	June 2008	Eridania Basin	2213	2.298	0.008	0	Sulfates, Al phases
	FRT0B0CB	3.1	85.9	June 2008	Libya Montes	559	2.305	0.01	0	Al phases
	FRT0B1BD	-3	350.9	June 2008	Meridiani	369	2.305	0.016	0
	FRT0B273	24.8	339.3	June 2008	Mawrth Vallis	958	2.291	0.012	0	Al phases
	FRT0B2A2	28.1	341.8	June 2008	Mawrth Vallis	973	2.291	0.012	0	Al phases
	FRT0B33A	2.3	359.9	June 2008	Meridiani	21945	2.298	0.006	0	Sulfates
	FRT0B6F1	-4.8	137.4	July 2008	Gale	4757	2.291	0.006	0	Sulfates
	FRT0BA45	-24.1	326.7	July 2008	Margaritifer Terra	698	2.305	0.012	0
	FRT0BB9C	27.2	344.9	July 2008	Mawrth Vallis	6316	2.298	0.013	0
	FRT0C4BB	-32.2	190.5	September 2008	Terra Sirenum	3674	2.311	0.011	0	Chlorides
	FRT0C518	-4.7	137.5	September 2008	Gale	2573	2.291	0.005	0
	FRT0C76C	-13.9	304	September 2008	Valles Marineris	945	2.305	0.01	0
	FRT0C8CD	-3.7	350.4	September 2008	Meridiani	497	2.298	0.007	0
	FRT0CB5C	-28.6	180.4	September 2008	Eridania Basin	2781	2.298	0.009	0
	FRT0CB64	2.3	122.4	September 2008	Nepenthes	74	2.305	0.016	0
	FRT0CC22	1.6	0.7	October 2008	Meridiani	5960	2.298	0.007	0	Sulfates
	FRT1178E	-28.6	181.8	March 2009	Eridania Basin	676	2.285	0.009	0
	FRT11D69	-35.2	173.4	April 2009	Eridania Basin	169	2.311	0.008	0
	FRT11DF2	-15	300	April 2009	Valles Marineris	2333	2.291	0.012	0	Sulfates
	FRT11EBF	-28.9	180.1	April 2009	Eridania Basin	278	2.311	0.012	0
	FRT12636	-34.6	183.5	May 2009	Eridania Basin	404	2.311	0.008	0
	FRT12658	-28.4	46.7	May 2009	Noachis Terra	1445	2.305	0.015	0
	FRT128EA	-18.4	332.2	May 2009	Margaritifer Terra	899	2.298	0.012	0
	FRT13039	-29.2	182	June 2009	Eridania Basin	2501	2.298	0.013	0
	FRT132AD	-16.4	308	June 2009	Valles Marineris	904	2.298	0.025	0
	FRT13421	-10.6	81.7	June 2009	Tyrrhena Terra	1192	2.305	0.021	0
	FRT13730	-6.9	298	July 2009	Valles Marineris	1700	2.298	0.018	0
	FRT13786	-34.4	172.4	July 2009	Eridania Basin	1862	2.311	0.021	0
	FRT137AD	-24.8	311.8	July 2009	Margaritifer Terra	9119	2.305	0.016	0
	FRT1382E	-28.6	180.6	July 2009	Eridania Basin	1542	2.298	0.017	0
	FRT13E88	-38	300.6	July 2009	Ogygis Planum	683	2.305	0.011	0
	FRT1676B	23.7	68.6	February 2010	Nili Fossae	7611	2.298	0.019	0
	FRT16BEE	-29.4	321.3	February 2010	Margaritifer Terra	1779	2.305	0.024	0
	FRT1703D	-23.5	71.7	March 2010	Hellas Basin	1492	2.311	0.029	0
	FRT17327	-5	137.1	March 2010	Gale	3780	2.311	0.005	0	Sulfates
	FRT1750D	-17.9	332.6	March 2010	Margaritifer Terra	4598	2.305	0.02	0
	FRT1756E	-24.9	312	March 2010	Margaritifer Terra	6813	2.305	0.023	0
	FRT17D33	-5.6	138.3	April 2010	Gale	1949	2.311	0.012	0	Sulfates
	FRT17E5D	-18	318.2	April 2010	Margaritifer Terra	597	2.305	0.017	0
	FRT18047	2.3	3.3	April 2010	Meridiani	3894	2.311	0.015	0	Sulfates
	FRT18C29	-5.4	137.2	May 2010	Gale	6467	2.291	0.006	0	Sulfates
	FRT18FCF	-9.8	306.6	October 2010	Valles Marineris	585	2.298	0.027	0
	FRT18FF2	-1.8	87.2	July 2010	Tyrrhena Terra	3744	2.311	0.012	0
	FRT190AE	33.7	16.9	May 2010	Ismenius	910	2.298	0.009	0
	FRT19C8D	-15.8	332.4	July 2010	Margaritifer Terra	2609	2.311	0.025	0
	FRT19D76	-24.2	326.6	July 2010	Margaritifer Terra	1379	2.305	0.022	0
	FRT19DD9	-5.5	138.4	July 2010	Gale	4677	2.291	0.015	0	Sulfates
	FRT1B94B	-1.8	340.8	October 2010	Margaritifer Terra	1236	2.305	0.018	0
	FRT1B9A8	-7	298	October 2010	Valles Marineris	2534	2.305	0.015	0
	FRT1BBA1	-5	137.3	November 2010	Gale	2917	2.298	0.01	0	Sulfates
	FRT1C4E2	-40.3	299	December 2010	Ogygis Planum	595	2.298	0.013	0
	FRT1C512	33.2	17.1	December 2010	Ismenius	612	2.298	0.014	0
	FRT1C5EE	-28.9	180.8	December 2010	Eridania Basin	255	2.298	0.013	0
	FRT1C6D6	-11.7	335.1	December 2010	Margaritifer Terra	3727	2.311	0.026	0
	FRT1D808	-39.3	295.7	March 2011	Ogygis Planum	3415	2.305	0.008	0
	FRT1FDD7	3.2	86	August 2011	Libya Montes	1308	2.311	0.012	0
	FRT21B73	-16.4	91.2	December 2011	Tyrrhena Terra	823	2.305	0.015	0
	FRT21E73	-28.2	318	December 2011	Margaritifer Terra	1395	2.311	0.023	0
	FRT23777	4.5	82.4	March 2012	Libya Montes	654	2.311	0.009	0
	FRT2440C	4.4	82.4	April 2012	Libya Montes	818	2.305	0.009	0
	FRT248F5	4.5	82.4	April 2012	Libya Montes	1200	2.305	0.007	0
	HRL07E6D	-27.5	323	Sept. 2007	Margaritifer Terra	297	2.305	0.007	0
	HRL0A226	-6.8	85.5	February 2008	Tyrrhena Terra	522	2.305	0.011	0
	HRL0A2B2	-4.8	68	February 2008	Terra Sabaea	37	2.305	0.01	0
	HRL0AC53	2.4	3.7	May 2008	Meridiani	810	2.298	0.009	0	Sulfates
	HRL0B6FF	22.5	77.6	July 2008	Nili Fossae	6338	2.305	0.015	0
	HRL0C0BA	20.8	75.8	August 2008	Nili Fossae	1241	2.305	0.013	0
	HRL0D0DE	-15.4	305.9	October 2008	Valles Marineris	605	2.305	0.014	0
	HRL12F9D	-34.4	172.4	June 2009	Eridania Basin	366	2.311	0.019	0
	HRL13CE1	15.6	72.8	July 2009	Nili Fossae	5277	2.305	0.018	0
	HRS030AF	-26.6	325.2	November 2006	Margaritifer Terra	465	2.298	0.022	0
	HRS0C6CF	2.3	122.4	September 2008	Nepenthes	379	2.305	0.008	0
	HRS0CD2D	33.7	17	October 2008	Ismenius	2192	2.291	0.02	0
	HRS1C5A8	-10.4	336.7	December 2010	Margaritifer Terra	708	2.305	0.039	0
	HRS1E1AC	-10.8	336.4	June 2011	Margaritifer Terra	2787	2.305	0.028	0
